1 Actin isovariant ACT7 regulates root meristem development in Arabidopsis through modulating  
2 auxin and ethylene responses

3 Takahiro Numata<sup>1§</sup>, Kenji Sugita<sup>1§</sup>, Arifa Ahamed Rahman<sup>2</sup> and Abidur Rahman<sup>1,2,3\*</sup>

4

5 <sup>1</sup>Department of Plant Bio Sciences, Faculty of Agriculture, Iwate University, Morioka 020-8550,  
6 Japan

7 <sup>2</sup>The United Graduate School of Agricultural Sciences, Iwate University, Morioka 020-8550,  
8 Japan

9 <sup>3</sup>Agri-Innovation Center, Iwate University, Morioka 020-8550, Japan

10

11

12

13 \*Corresponding author: Email: [abidur@iwate-u.ac.jp](mailto:abidur@iwate-u.ac.jp)

14

15 § These authors contributed equally.

16

17

18

19

20 Running title: Actin isovariant specific regulation of root meristem development

21

22

23

24

25

26

27

28

29  
30  
31  
32  
33  
34  
35  
36  
37  
38  
39  
40  
41  
42  
43  
44  
45  
46  
47  
48  
49  
50  
51  
52  
53  
54  
55  
56  
57  
58  
59

## Abstract

Meristem, which sustains a reservoir of niche cells at its apex, is the most functionally dynamic part in a plant body. The shaping of the meristem requires constant cell division and cell elongation, that are regulated by hormones and cell cytoskeletal components, actin. Although the roles of hormones in regulating meristem development have been extensively studied, the role of actin in this process is still elusive. Using the single and double mutants of the vegetative class actin, we demonstrate that ACT7 plays a primary role in regulating the root meristem development. In absence of ACT7, but not ACT8 and ACT2, cellular depolymerization of actin is observed. Consistently, *act7* mutant shows reduced cell division, cell elongation and meristem length. Intracellular distribution and trafficking of auxin transport proteins in the actin mutants revealed that ACT7 specifically functions in root meristem to facilitate the trafficking of auxin efflux carriers PIN1 and PIN2, and consequently the transport of auxin. Compared with *act7*, *act7act8* double mutant shows slightly enhanced phenotypic response and altered intracellular trafficking. The altered distribution of auxin in *act7* and *act7act8* affects the roots response to ethylene but not to cytokinin. Collectively, our results suggest that Arabidopsis root meristem development is primarily controlled through actin isovariant ACT7 mediated modulation of auxin-ethylene response.

## 60 **Introduction:**

61 Meristem, which sustains a reservoir of niche cells at its apex, is the most functionally  
62 dynamic part in a plant body. The formation of meristem is essential for plant growth and  
63 development, and this process is regulated by interaction of multiple signaling networks, including  
64 receptor kinase signaling, transcriptional signaling, and hormonal signaling and transport (Barton,  
65 2010). The shaping up of the meristem requires a constant cell division and cell elongation of the  
66 source stem cells. Both the hormones and cell cytoskeletal components have been attributed to  
67 regulate the cell division and cell elongation processes in the meristem cells (Rahman et al., 2007)

68 Several studies have revealed that the asymmetric cell division and expansion processes are  
69 controlled by a dynamic cell cytoskeleton consisting dozens of interacting proteins that responds  
70 to both environmental and developmental cues (Clayton and Lloyd, 1985; Lloyd, 1991; Baluška  
71 et al., 2001; Kandasamy et al., 2007). Actin, a highly conserved and ubiquitous protein, is a major  
72 component of the cell cytoskeleton and essential for various important cellular processes, including  
73 cell division and cytokinesis, establishment of cell polarity, cell division plane determination, cell  
74 shape, cell polarity, protein trafficking, cytoplasmic streaming, organelle movement and tip growth  
75 (Staiger and Schliwa, 1987; Smith and Oppenheimer, 2005; Staiger and Blanchoin, 2006;  
76 Kandasamy et al., 2009; Pollard and Cooper, 2009). Plants have multiple actin isoforms encoded  
77 by large ancient gene families (McLean et al., 1990; Meagher, 1991). In *Arabidopsis*, there are  
78 eight actin isovariants, which are grouped in two ancient classes, reproductive and vegetative  
79 classes (Kandasamy et al., 2009), supplementary Fig. 1). Several lines of evidence strongly suggest  
80 that the two major classes of plant actin isovariants are functionally distinct. The vegetative actin  
81 isovariants, expressed in young tissues play role in meristem development, while the plants  
82 reproduction is regulated by reproductive class of actin (Gilliland et al., 2002). Recent  
83 experimental approaches using different isovariants of actin further confirm that the three  
84 vegetative actin isovariants play distinct subclass specific roles during plant morphogenesis  
85 (Gilliland et al., 2003; Kandasamy et al., 2009). For instance, among three vegetative actin, *ACT7*  
86 has been shown to be preferentially and strongly expressed in all young and developing vegetative  
87 tissue including root meristem, and *ACT7* expression is strongly altered by plant hormone auxin  
88 and several external stimuli (McDowell et al., 1996). It also has been shown that *ACT7* regulates  
89 the germination, root growth, epidermal cell specification, and root architecture (Gilliland et al.,  
90 2003; Kandasamy et al., 2009). On the other hand, *ACT2* and *ACT8* regulate bulge site selection,

91 root hair growth, and leaf morphology (Ringli et al., 2002; Nishimura et al., 2003; Kandasamy et  
92 al., 2009; Vaškebová et al., 2018).

93 Another major regulator of plant growth and development is hormone. The root meristem  
94 development is controlled by a complex regulatory network of hormones involving auxin, ethylene  
95 and cytokinin (Bertell and Eliasson, 1992; Liu et al., 2017). Auxin plays a central role in this  
96 regulatory network through interacting with other two hormones (Rahman, 2013). Polar auxin  
97 driven formation of robust auxin gradient is an absolute requirement for root meristem  
98 development (Benková et al., 2003; Friml, 2003; Grieneisen et al., 2007). It has also been shown  
99 that root-produced auxin is required for root stem cell niche maintenance (Brumos et al., 2018).  
100 Collectively, local auxin biosynthesis and auxin transport act redundantly to establish and maintain  
101 the robust auxin maxima critical for root meristem development. This auxin maxima at the root  
102 tip, in combination with separable roles of auxin in cell division and cell expansion, can explain  
103 the root meristem development.

104 Cytokinin has been shown to be another major regulator to control the meristem activity.  
105 Experiments resulting in depletion of cytokinin in the root meristem along with cytokinin mutants  
106 analyses revealed that cytokinin functions at the transition zone to control the cell differentiation  
107 rate (Dello Ioio et al., 2007; Müller and Sheen, 2007; Dello Ioio et al., 2008). The classical  
108 antagonistic interaction between cytokinin and auxin that regulates the root and shoot  
109 organogenesis has been extended to the root meristem development and shown to be regulated  
110 through a simple regulatory circuit converging on the *Aux/IAA* gene *SHY2/IAA3*, and polar auxin  
111 transport mediated auxin gradient (Dello Ioio et al., 2008a; Chapman and Estelle, 2009; Růžička  
112 et al., 2009; Moubayidin et al., 2010)

113 Ethylene also plays an important role in root meristem development. Cell division in  
114 quiescent cells, which act as a source of stem cells, has been shown to be modulated by Ethylene.  
115 The ethylene-induced new cells in the quiescent center (QC) express QC specific genes that can  
116 repress differentiation of surrounding cells (Ortega-Martínez et al., 2007). Consistently,  
117 constitutive triple response mutant *ctr1* show reduced meristematic cell division and meristem size,  
118 while the ethylene insensitive mutant *ein2* shows opposite phenotype. Exogenous application of  
119 ethylene also mimics the constitutive phenotype (Street et al., 2015). Auxin-ethylene interaction  
120 for root growth and development has been well studied (Rahman et al., 2001; Rahman et al., 2002;

121 Stepanova et al., 2005; Muday et al., 2012). Reduction in intracellular auxin level results in  
122 ethylene insensitivity that affects the root morphology. The ethylene sensitivity and the root  
123 morphology could be restored by increasing the intracellular auxin level using exogenous auxin  
124 (Rahman et al., 2001). Conversely, ethylene has been shown to promote auxin synthesis and  
125 transport in root tips resulting in formation of a second auxin maximum in the root elongation zone  
126 and alteration in root meristem development (Růzicka et al., 2007; Stepanova et al., 2007; Swarup  
127 et al., 2007; Stepanova et al., 2008). Ethylene-induced local auxin synthesis is achieved by  
128 upstream tryptophan biosynthesis enzyme genes *WEI2/ASA1* and *WEI7/ASB1* genes that are  
129 precisely regulated by ethylene (Stepanova et al., 2005; Okamoto et al., 2008). This local auxin  
130 synthesis by ethylene also alters the auxin gradient in the root tip and affects the root meristem  
131 development (Okamoto et al., 2008). Furthermore, it has been shown that *SHY2/IAA3* is a point of  
132 convergence for both ethylene and cytokinin in negatively regulating cell proliferation (Street et  
133 al., 2015).

134         Although the cell division and cell proliferation that control the meristem development are  
135 regulated by both hormones and cell cytoskeleton component actin, the integrating mechanisms of  
136 these two components remain elusive. It has been shown that mutations in vegetative actin  
137 isovariant genes result in alteration in root morphology and root development (Ringli et al., 2002;  
138 Gilliland et al., 2003; Nishimura et al., 2003; Kandasamy et al., 2009; Vaškebová et al., 2018).  
139 However, it remains obscure how the isovariant specific actin regulates the root developmental  
140 process. In the present study, using a combinatorial approach of physiology, genetics, and cell  
141 biology we demonstrate that root meristem development is primarily controlled by actin isovariant  
142 ACT7. In absence of ACT7, but not ACT8 and ACT2, cellular depolymerization of actin was  
143 observed. Consistently, *act7* mutant showed reduced cell division, cell elongation and meristem  
144 length. Intracellular distribution and trafficking of auxin transport proteins in the actin mutants  
145 revealed that ACT7 specifically functions in root meristem to facilitate the trafficking of auxin  
146 efflux carriers PIN1 and PIN2, and consequently the transport of auxin. Compared with *act7*,  
147 *act7act8* double mutant shows slightly enhanced phenotypic response and altered intracellular  
148 trafficking. The altered distribution of auxin in *act7* and *act7act8* affects the roots response to  
149 ethylene but not to cytokinin. Collectively, our results suggest that Arabidopsis root meristem  
150 development is primarily controlled through actin isovariant ACT7 mediated modulation of auxin-  
151 ethylene response.

152 **Results:**

153 **Root actin organization is primarily regulated by actin isovariant ACT7**

154 To investigate the effect of mutations in vegetative actin genes on intracellular actin  
155 structure and organization, we observed the actin structure using both immunostaining and live  
156 cell imaging approaches. Actin in elongation zone was observed as the structure of the actin in this  
157 zone is most reliable to compare. For live cell imaging, actin mutants were crossed with the actin  
158 marker line ABD2-GFP (Actin Binding Domain 2 of Fimbrin protein, Wang et al., 2007) and  
159 homozygous lines were selected. The actin structure observed by both the approaches was largely  
160 similar. In wild type, actin labeled in elongation zone showed fine filamentous cable like structure  
161 (Fig. 1A). Actin filament structure in *act2-1* and *act8-2* showed normal actin filaments like wild-  
162 type (Figs. 1B, 1D). Comparable results were observed with live cell imaging using actin marker  
163 lines (Figs. 1G, 1H, 1J). Loss of both ACT2 and ACT8 did not affect the structure of the actin.  
164 Although a slight reduction of actin was observed in immunostained samples, the actin structure  
165 in *act2act8ABD2-GFP* lines was like wild-type (Figs. 1E and 1K). In contrast, loss of ACT7  
166 drastically affected actin structure, showing segmented and aberrant actin cables (Figs. 1C, 1I).  
167 This fragmented and aberrant actin phenotype was slightly more enhanced in *act7act8* double  
168 mutant (Figs. 1F; 1L), suggesting that among the actin isovariants, ACT7 plays a key role in  
169 determining the root actin structure.

170 **Intracellular actin organization affects the primary root elongation and meristem**  
171 **development**

172 To understand whether the change in the actin structure observed in actin mutants  
173 correlate the plant growth and development, next we performed the comparative analysis of these  
174 actin isovariant mutants against wild-type for root elongation, meristem size, cell production rate  
175 and cell length (Fig. 2, Table 1). Seedling phenotype of single and double mutants revealed that  
176 the primary root elongation is severely compromised in the mutants where ACT7 is mutated. Both  
177 the *act7* and *act7act8* mutants showed dwarf root phenotype, while the wild-type like or a slight  
178 increase in the primary root elongation was observed in *act2*, *act8* and *act2act8* (Fig. 2A). The  
179 *act7act8* double mutant showed a little more severe phenotype than *act7-4* single mutant (Fig. 2A).  
180 These phenotypic observations suggest that the intracellular actin organization directly influences

181 the primary root elongation and further reveals that that ACT7 is the primary regulator of this  
182 process.

183 Root elongation is regulated by both cell division and cell elongation and consequently  
184 linked to the root meristem size and development (Beemster and Baskin, 1998). The assessment  
185 of meristem length in vegetative class actin isovariant mutants revealed that dwarf root phenotype  
186 observed in *act7* and *act7act8* mutants is a consequence of reduced meristem development (Figs.  
187 2B, 2C). In contrast, *act2* and *act2act8* showed a slight but statistically significant increase in  
188 meristem length (Figs. 2B, 2C). Taken together, these results suggest that actin isovariants regulate  
189 root meristem development separately. ACT7 plays role in primary root meristem development as  
190 a positive regulator, while ACT2 may function as negative regulator.

191 To further understand how actin isovariant regulates the root meristem size, we took a  
192 kinematic approach as described earlier (Rahman et al., 2007). The root elongation rate and the  
193 length of the newly matured cortical cells were measured in wild type, *act2-1*, *act8-2*, *act7-4*,  
194 *act2act8*, and *act7act8* mutants. The ratio of mature cell length to root elongation rate gives the  
195 time required to produce one cortical cell (per cell file); which is also defined as the cell production  
196 rate (Silk et al., 1989). The cell production rate represents the output of the meristem reflecting  
197 both the number of dividing cells and their rates of division (Beemster and Baskin, 1998; Rahman  
198 et al., 2007). Kinematic analysis revealed that that loss of ACT7 results in a large reduction in root  
199 elongation, cell length, and subsequently lower cell production rate (Table 1). Further, the double  
200 mutant *act7act8*, which shows a little more severe root phenotype than *act7-4*, also shows a  
201 reduced cell division activity compared with *act7-4*. These data suggest that ACT7 plays a  
202 dominant role in regulating the cell division activity at primary root meristem. Loss of ACT8 alone  
203 does not change the cell production activity but loss of ACT8 in conjunction with ACT7 affect the  
204 roots cell division ability negatively, consistent with the idea that actin plays a significant role in  
205 controlling the cell division and ACT7 isovariant is the primary regulator of this process (Table  
206 1). On the other hand, loss of ACT2 results in an increased cell production rate although the cell  
207 length is not affected. The double mutant *act2act8* also shows a similar trend (Table 1). Taken  
208 together, these results suggest that the root meristem development is regulated by isovariant  
209 specific actin, and ACT7 is the primary regulator of this process.

210

## 211 **ACT7 modulates the intracellular trafficking of a subset of auxin transport proteins**

212 In eukaryotic cells, targeting of proteins to specific organelles or to and from membrane is  
213 regulated by protein trafficking, an important process for cellular activity and growth. It is  
214 generally assumed that the cytoskeleton component actin acts like a network of tracks for the  
215 movement of vesicles between cellular compartments (Simon and Pon, 1996; Huang et al., 1999;  
216 Nebenführ and Staehelin, 2001; Kim et al., 2005). Polar transport and the formation of auxin  
217 gradient in the root meristem largely relies on the intracellular trafficking of PIN proteins through  
218 which the proteins are correctly localized to the membrane (Feraru and Friml, 2008), and this  
219 localization of PIN efflux carriers has been shown to be actin dependent. Disruption in actin  
220 structure results in reduced trafficking of these proteins to and from the membrane and  
221 subsequently affects their asymmetric localization (Geldner et al., 2001; Muday and Murphy,  
222 2002; Rahman et al., 2007; Kleine-Vehn and Friml, 2008). Since polar auxin mediated auxin  
223 gradient at root tip plays a major role in regulating root meristem development and actin mutants  
224 show altered root meristem size, we hypothesized that the observed meristem phenotype in these  
225 mutants may be linked to the altered trafficking of the auxin transporters. To test this hypothesis,  
226 we investigated the intracellular localization of the PIN proteins in actin mutant backgrounds. Live  
227 cell imaging analyses using translationally fused GFP with PIN proteins in various actin mutant  
228 backgrounds revealed that the loss of actin does not alter the polar localization of these proteins  
229 (Figs. 3-5). However, the intracellular trafficking of PIN1 and PIN2 is found to be affected by a  
230 specific actin isoform ACT7. Intracellular PIN1 and PIN2 protein agglomerations were observed  
231 in *act7* and *act7act8* mutants but not in *act2*, *act8* or *act2act8* mutants (Figs. 3 and 4). Further, the  
232 PIN2 protein aggregation was observed only in the meristem cells of *act7* and *act7act8*, not in the  
233 cells of transition zone (Fig. 4). For PIN7, loss of ACT7 results in a slight reduction in the  
234 expression of the protein, which is further downregulated in *act7act8* double mutant. No notable  
235 change in PIN7 expression was observed in *act8* or *act2act8* mutant background (Fig. 5). On the  
236 other hand, loss of ACT7 or ACT8 does not affect the trafficking or expression of PIN4 or auxin  
237 influx carrier AUX1 (Fig. 5).

238 Taken together, these results suggest that actin isoform ACT7 provides the primary track for the  
239 intracellular trafficking of PIN1 and PIN2 and ACT8 possibly functions as secondary track.

240

## 241 **Auxin gradient at root tip is altered in *act7* and *act7act8* mutants**



242 Since the intracellular trafficking of the auxin proteins play important roles in determining  
243 the cellular auxin flow and formation of auxin gradients required for maintenance of stem cell  
244 niche and meristem development, we next investigated whether the observed alterations of  
245 intracellular trafficking of PIN1 and PIN2 affects the auxin gradient formation in actin isovariant  
246 mutants. Auxin gradient formation assessment using two widely used auxin reporter lines *DR5-*  
247 *GUS* and *IAA2-GUS* revealed that actin isovariant *ACT7* plays a major role in regulating this  
248 process as reduced GUS signal was observed at the *act7* root tip (Fig. 6). Auxin gradient formation  
249 was not altered in *act8* mutant. *act7act8* double mutant shows a complete loss of auxin gradient at  
250 the root tip, although the GUS signal could be observed in the upper part of the root (Fig. 6).  
251 Exogenous application of IAA could increase the GUS signal at the root tip of *act7* but not in  
252 *act7act8* (Fig. 6). These results confirm that the root auxin gradient formation is primarily  
253 dependent on actin isovariant *ACT7* regulated PIN1 and PIN2-mediated auxin flow.

254

#### 255 **Auxin transport is altered in *act7* mutant**

256 To confirm that the reduced auxin gradient in *act7* mutant is due to reduced transport  
257 resulting from the altered trafficking of PIN1 and PIN2, we performed the auxin transport assay  
258 using radiolabeled IAA. Compared with wild-type, both rootward and shootward transports were  
259 found to be reduced in *act7-4* mutant, confirming that the observed reduction in auxin gradient at  
260 root tip is due to the altered transport of auxin (Fig. 7).

261

#### 262 **Ethylene response is altered in *act7* and *act7act8* mutants**

263 Auxin and ethylene function as collaborators for primary root development (Muday et al., 2012),  
264 and it has been shown that reduction in intracellular auxin level affects the cellular ethylene  
265 response (Rahman et al., 2001; Rahman et al., 2002; Stepanova et al., 2005; Stepanova et al., 2007;  
266 Swarup et al., 2007). Since ethylene is involved in regulating stem cell niche (Ortega-Martínez et  
267 al., 2007) and directly influences the root meristem cell division, we checked whether the reduced  
268 meristematic cell division observed in *act7* and *act7act8* mutants are also linked to root ethylene  
269 response. To clarify the issue, first we investigated whether the ethylene-induced auxin response  
270 is altered. For this, we investigated the expression of a reporter line containing transcriptional  
271 fusion of *ANTHRANILATE SYNTHASE β1* to *GUS* (*ASB1-GUS*), which catalyzes one of the rate-  
272 limiting steps of tryptophan biosynthesis, a precursor of IAA (Stepanova et al., 2005), and is

273 specifically induced by ethylene (Guo and Ecker, 2004; Stepanova et al., 2005; Okamoto et al.,  
274 2008). Consistent with the previous report, in the wild type, the GUS activity driven by *ASB1* was  
275 found to be exclusively localized in the root tip, and no expression in the elongation zone  
276 (Stepanova et al., 2005; Figure 8A). Loss of *ACT7* and both *ACT7* and *ACT8* result in ectopic  
277 GUS expression. In *act7* and *act7act8* mutants, although complete loss of GUS activity was  
278 observed at the root tip, unusual high activity was observed in the elongation zone, suggesting that  
279 ethylene-induced auxin production at root tip is blocked in these mutant backgrounds (Fig. 8A).  
280 To further understand whether the reduction in auxin response also affects the ethylene response,  
281 we investigated the expression of the *ETR2*, *CTR1* and *EIN2*, that regulate the ethylene response  
282 pathway. Although *ETR2* and *CTR1* expression was unaltered in *act7* and *act7act8* mutants, *EIN2*,  
283 which functions as a positive regulator for ethylene response (Alonso, 1999) was found to be down  
284 regulated in both the mutant backgrounds (Fig. 8 B-D). The down regulation of *ASB1*, and *EIN2*  
285 suggest that along with auxin, ethylene response is also affected by loss of *ACT7* and *ACT8*, and  
286 *ACT7* plays a primary role in this process.

287

### 288 **Altered meristem development of *act7* and *act7act8* mutants is independent of cytokinin**

289 Auxin-cytokinin interaction is another major regulator of root meristem development  
290 (Dello Ioio et al., 2007). Since *act7* and *act7act8* mutants showed a clear defect in meristematic  
291 cell production rate and showed altered response to auxin, we next investigated whether the  
292 cytokinin response is also affected by the loss of actin isoforms. For this, we observed the  
293 expression of cytokinin specific synthetic marker TCS-GFP, and analyzed the cytokinin specific  
294 genes *ARR1*, *ARR12* (Muller and Sheen, 2007) expression in *act7* and *act7act8* mutant  
295 backgrounds. Unlike auxin markers, we did not observe any alteration in the expression of  
296 cytokinin responsive marker or genes in *act7* and *act7act8* mutant backgrounds (Fig.9).  
297 Interestingly, expression of *Aux/IAA* gene *SHY2/IAA3* (Tian and Reed, 1999) was found to be  
298 drastically reduced in both *act7* and *act7act8* mutants. Taken together, these results suggest that  
299 the altered meristem development in *act7* and *act7act8* mutants is regulated through a pathway  
300 that is independent of cytokinin response.

301

### 302 **Discussion**

303           Root organogenesis largely relies on the primary root meristem development, which in turn  
304 is regulated by the coordinated function of cell division, cell differentiation and cell elongation.  
305 Plant hormones auxin, cytokinin and ethylene have been shown to control this coordination and  
306 local auxin gradient formed by the polar transport of auxin turns out to be the regulatory switch in  
307 integrating all these aspects. Earlier, it was shown that cytokinin promotes root cell differentiation  
308 through suppressing the auxin distribution in the meristem (Dello Ioio et al., 2008a; Růžicka et al.,  
309 2009), and formation of local auxin gradient at the root apex promotes the cell division (Brumos  
310 et al., 2018). Ethylene also affects the root development through modulating auxin transport and  
311 auxin gradient (Růžicka et al., 2007; Lewis et al., 2011). The formation of auxin gradient depends  
312 on the polar transport of auxin, which is regulated by the intracellular trafficking mediated correct  
313 localization of the cellular auxin efflux carriers PINs (Luschnig et al., 1998; Geldner et al., 2001).  
314 The cell cytoskeleton component actin plays a major role in facilitating the trafficking of auxin  
315 efflux carriers by providing track for the movement of these proteins (Geldner et al., 2001; Muday  
316 and Murphy, 2002; Rahman et al., 2007; Kleine-Vehn et al., 2008). However, what remains  
317 obscure is which type of actin contributes to this trafficking process and whether they directly  
318 regulate the cellular auxin gradient formation and thereby root meristem development. Taking  
319 advantage of the vegetative class actin isovariant mutants, in this study we answered these  
320 questions. Our results demonstrate that root meristem maintenance is largely dependent on the  
321 ACT7 class actin filament but not on ACT8 and ACT2 (Fig. 2). Loss of ACT7 results in  
322 fragmented and depolymerized actin that affects the expression and trafficking of a subset of auxin  
323 efflux carriers mainly PIN1, PIN2 and PIN7 and subsequently the polar transport mediated auxin  
324 gradient at the root tip (Figs. 1, 3, 4, 5, 6). The consequence of this cascade results in reduced cell  
325 division and shorter root meristem (Fig. 2). These findings are consistent with the previous results  
326 showing that disruption of actin, by actin depolymerization drug Latrunculin B resulted in reduced  
327 cell division and inhibition of primary root elongation (Baluška et al., 2001; Rahman et al., 2007),  
328 and *act7* mutant shows a dwarf seedling phenotype including a severe reduction in the primary  
329 root elongation (Gilliland et al., 2003). The actin structure, trafficking and expression of PIN  
330 proteins and root meristem development were completely unaffected in absence of other vegetative  
331 class actin isovariants ACT2 or ACT8. Collectively, these results suggest that intact actin  
332 cytoskeleton maintained by ACT7 isovariant is the primary regulator of root meristem  
333 development.

334 The analysis of the actin isovariant mutants clearly supported the previous claims that the  
335 trafficking of the auxin efflux carriers PIN1 and PIN2 is actin dependent (Geldner et al., 2001;  
336 Muday and Murphy, 2002; Rahman et al., 2007). It further clarifies that ACT7 isovariant is the  
337 main regulatory actin for this process as PIN1 and PIN2 trafficking as well as the auxin gradient  
338 at the tip are not affected at all by the loss of ACT2 and ACT8 (Figs. 3, 4, 6). Interestingly, PIN4,  
339 PIN7 and AUX1 trafficking is not affected by the loss of ACT7, suggesting that not all auxin  
340 carriers trafficking is actin dependent (Fig. 5). The ACT7 mediated PIN1 and PIN2 trafficking is  
341 possibly regulated by the ABCB chaperone TWISTED DWARF1 (TWD1) as ACT7 was found to  
342 be an indirect interactor of TWD1 (Zhu et al., 2016). However, there could be other ACT7  
343 interacting proteins that may regulate this process and need to be identified. The finding that only  
344 one actin isovariant ACT7 affects the root meristem developmental process through modulating  
345 auxin distribution is not inconsistent as it was previously shown that ACT7 affects the primary  
346 root growth and response to auxin during callus formation (Kandasamy et al., 2001; Kandasamy  
347 et al., 2009).

348 The reduced meristem growth in *act7* was found to be linked to the inhibition of cell  
349 division and cell elongation (Fig. 2, Table 1). Our results suggest that this growth reduction and  
350 the inhibition of cell division are directly linked to the auxin maximum at the root tip. In *act7*  
351 mutant, we observed a depletion in auxin maximum, while in *act7act8* mutant the auxin maximum  
352 was absent at the root tip (Fig. 6). The reduced auxin maximum in *act7* and *act7act8* mutant is a  
353 consequence of both reduction in polar transport of auxin, and the auxin synthesis at root tip (Figs.  
354 7 and 8). This difference in auxin maximum is reflected in their root meristem development and  
355 cell division where *act7act8* shows more severe phenotype compared with *act7* (Fig. 2; Table 1).  
356 Interestingly, although these mutants show less or no auxin maxima at root tip, they showed auxin  
357 response in elongation zone confirming that they retain the capability to respond to auxin.  
358 Consistently, exogenous application of auxin results in increased response in the elongation zone  
359 (Fig. 6). These results are consistent with the idea that local auxin maximum at root tip is an  
360 absolute requirement for meristematic cell division and meristem growth (Grieneisen et al., 2007;  
361 Brumos et al., 2018).

362 The reduction in the intracellular auxin level at the root meristem also affected the ethylene  
363 response. Ethylene specific auxin biosynthesis gene *ASβ1*, and the central ethylene response  
364 regulator *EIN2* were down regulated in the root meristem of both *act7* and *act7act8* mutants (Fig.

365 8). This is consistent with the previous findings that intracellular auxin level regulates the root  
366 ethylene response, and the response can be restored by alleviating the intracellular auxin level  
367 (Rahman et al., 2001; Muday and Murphy, 2002; Rahman et al., 2002). Collectively, these results  
368 suggest that the altered root meristem development in *act7* and *act7act8* mutants is a consequence  
369 of loss of both auxin and ethylene responses.

370 Involvement of auxin-cytokinin interaction in root meristem development has been well  
371 studied and shown to be controlled through a balance between cell division and cell differentiation  
372 mediated by a simple regulatory circuit converging on Aux/IAA family protein SHY2/IAA3  
373 (Dello Ioio et al., 2008a; Moubayidin et al., 2010). The primary cytokinin- response transcription  
374 factors *ARR1* and *ARR12* activates the *SHY2/IAA3*, a repressor of auxin signaling, that negatively  
375 regulates the expression of *PIN1*, *PIN3* and *PIN7* genes and thereby alters the auxin distribution  
376 in the root meristem (Dello Ioio et al., 2008a; Růžicka et al., 2009; Moubayidin et al., 2010). To  
377 understand whether the altered auxin maximum at the root tip and the altered root meristem  
378 development of *act7* and *act8* is a consequence of altered cytokinin response, we investigated the  
379 expression of *ARR1*, *ARR12* and *SHY2/IAA3* in the mutant background. Neither *ARR1*, nor *ARR12*  
380 expression was altered in *act7* or *act7act8* double mutant. Consistently, we also did not observe  
381 any change in the synthetic cytokinin marker *TCS-GFP* (Fig. 9). Interestingly, we found that  
382 *SHY2/IAA3*, which belong to primary auxin responsive gene family *Aux/IAA* (Abel and Theologis,  
383 1996) was downregulated in both *act7* and *act7act8* mutants (Fig. 9). *IAA3* has also been shown  
384 to directly influence the auxin-regulated Arabidopsis root development (Tian and Reed, 1999).  
385 These observations confirm that the altered root meristem development observed in loss of ACT7  
386 mutant is directly linked to altered auxin response. *ARR1*, *ARR12* regulated *SHY2/IAA3* pathway is  
387 more dominant in older seedlings compared with younger seedlings as at the early seedling stage  
388 only *ARR12* is expressed and *SHY2* level is relatively low (Moubayidin et al., 2010). Consistently,  
389 auxin regulated cell division predominates over cytokinin regulated cell differentiation to shape  
390 the meristem development at early seedling stage (Chapman and Estelle, 2009; Moubayidin et al.,  
391 2010). The observation that the altered root meristem development in the loss of ACT7 is primarily  
392 dependent on auxin response and independent of cytokinin is consistent with above findings as we  
393 characterized the root meristem at the early stage of development.

394

395 In conclusion, in the present study we demonstrated that primary root meristem  
396 development is exclusively controlled by actin isovariant ACT7 mediated auxin redistribution in  
397 the root tip and primarily regulated by auxin-ethylene interaction but independent of cytokinin.

398

## 399 **Materials and methods**

### 400 **Plant materials and growth conditions**

401 All lines are in the Columbia background of *Arabidopsis thaliana* (L.). *ASB1-GUS* was a gift  
402 of Jose Alonso (University of North Carolina, Raleigh, USA), PIN2-GFP (Xu and Scheres, 2005)  
403 was gift of B. Scherers (University of Utrecht, The Netherlands), GFP-ABD2-GFP (Wang et al.,  
404 2007) was a gift of E.B. Blancaflor (Samuel Roberts Noble Foundation, Ardmore, OK, USA).  
405 *IAA2:GUS* and *AUX1-YFP* were gifts of Malcolm Bennett (Swarup et al., 2007). PIN4-GFP and  
406 PIN7-GFP were gift of Gloria Muday (Wake Forest University, NC, USA). Columbia-0, PIN1-  
407 GFP and *aux1-7* were obtained from the Arabidopsis Biological Resource Center (Columbus, OH,  
408 USA). The *act8-2*, *act7-4* *act7act8*, *act2-1*, and *act2act8* were gifts of R. Meagher (University of  
409 Georgia, Athens, Georgia). Various marker lines in actin isovariant mutant background were  
410 generated in the laboratory by crossing, and independent homozygous lines for the mutation and  
411 expressing the GFP or GUS reporter were identified by screening for fluorescence, GUS assay and  
412 seedling phenotype.

413 Seeds were sterilized in 20% kitchen bleach (Coop Clean Co., <http://www.coopclean.co.jp>) for  
414 15 minutes and washed 3 times in sterilized dH<sub>2</sub>O. Surface-sterilized seeds were placed in round,  
415 9 cm Petri plates on modified Hoagland' s medium (Baskin and Wilson, 1997) containing 1% w/v  
416 sucrose and 1% w/v ager (Difco Bacto ager, BD laboratories; <http://www.bd.com>). Two days after  
417 stratification at 4°C in the dark, plates were transferred to growth chamber (NK system, LH-  
418 70CCFL-CT, Japan, <http://www.nksystems.co.jp/>) at 23°C under continuous white light at an  
419 irradiance of about 100  $\mu\text{mol m}^{-2} \text{s}^{-1}$ . The seedlings were grown vertically for 5 or 7 days.

### 420 **Chemicals**

421 IAA was purchased from Sigma-Aldrich Chemical Company  
422 (<http://www.sigmaaldrich.com>). Other chemicals were purchased from Wako Pure Chemical  
423 Industries (<http://www.wako-chem.co.jp/>). FM4-64 was purchased from Invitrogen

424 (<http://www.thermofisher.com>). [<sup>3</sup>H] IAA (20 Ci mmol<sup>-1</sup>) was purchased from American  
425 Radiolabeled Chemicals (<http://www.arcinusa.com>).

#### 426 **Growth, cell length and cell production rate assays**

427 Root elongation rate was measured by scoring the position of the root tip on the back of  
428 the Petri plate once per day. Cortical cell length was measured using light microscope (Diaphot,  
429 Nikon, [www.nikon.co.jp](http://www.nikon.co.jp)) equipped with a digital camera control unit (Digital Sight [DS-L2],  
430 Nikon) as described earlier (Rahman et al., 2007). To ensure newly matured cells were scored, no  
431 cell was measured closer to the tip than the position where root hair length was roughly half  
432 maximal. The length of 20 mature cortical cells was measured from each root, with eight roots  
433 used per treatment. The cell production rate (cells day<sup>-1</sup>) was calculated by taking the ratio of root  
434 elongation rate (mm day<sup>-1</sup>) and average cell length (μm) for each individual and averaging over all  
435 the roots in the treatment. The results were obtained from at least three biological replicates per  
436 genotype.

#### 437 **GUS staining, immunostaining, and live cell imaging**

438 GUS staining was performed as described earlier (Okamoto et al., 2008). In brief, 5-d-old  
439 vertically grown seedlings were used for GUS assay. Seedlings were transferred to GUS staining  
440 buffer (100 mM sodium phosphate pH 7.0, 10 mM EDTA, 0.5 mM potassium ferricyanide, 0.5  
441 mM potassium ferrocyanide, and 0.1 % Triton X-100 ) containing 1mM X-gluc and incubated at  
442 37°C in the dark for various time length as mentioned in the figure legends. To observe the effect  
443 of exogenous auxin on GUS expression, the seedlings were incubated in 1 μM IAA for 3h and  
444 subjected to GUS staining as described above. Roots were cleared as described earlier (Shibasaki  
445 et al., 2009). The roots were imaged with a light microscope (Nikon Diaphot) equipped with a  
446 digital camera control unit (Digital sight, DS-L2; Nikon).

447 Actin immunostaining was performed using the protocol described earlier by Rahman et  
448 al. (2007) with modification. In brief, Five-day-old Arabidopsis seedlings were fixed in PIPES  
449 buffer (50 mM PIPES, 4% paraformaldehyde, 1.2% glutaraldehyde, 1 mM CaCl<sub>2</sub>, 0.4 mM  
450 maleimidobenzoyl-N-hydroxy succinimide) for 60 min, followed by rinsing in PME buffer (50  
451 mM PIPES, 5 mM EGTA, and 2 mM MgSO<sub>4</sub>) 3 times for 10 min each. After the PME washing,  
452 the seedlings were extracted for 60 min in PME buffer containing 1% Triton X-100. The seedlings

453 were then subjected to digestion for 15 min in PBS with 0.001% pectolyase and 0.01% pectinase,  
454 and rinsed three times for 5 min in PME with 10% glycerol and 0.002% Triton X-100. Seedlings  
455 were permeabilized by incubating them at  $-20^{\circ}\text{C}$  in methanol for 30 min, followed by rehydration  
456 in PBS for three times 5 min each. Seedlings were incubated in the primary mouse monoclonal  
457 anti-(chicken gizzard) actin, clone 4 (Millipore, <http://www.millipore.com>) diluted 1:200 in PBS,  
458 1% BSA, and 0.01% sodium azide (PBA) overnight. After the incubation, the seedlings were  
459 washed for three times 5 min each and then incubated in the secondary antibody Cy-3-goat anti-  
460 mouse IgG (1:200; Jackson ImmunoResearch, <http://www.jacksonimmuno.com>). The imaging was  
461 performed on a Nikon laser scanning microscope (Eclipse Ti equipped with Nikon C2 Si laser  
462 scanning unit) equipped with a  $\times 60$  oil immersion objective.

463 To image GFP, YFP and FM 4-64-stained roots, five-day-old seedlings were mounted in  
464 liquid growth medium on a cover glass for observation on a Nikon laser scanning microscope  
465 (Eclipse Ti equipped with Nikon C2 Si laser scanning unit) and imaged with either a  $\times 20$  dry or  
466  $\times 40$  water immersion objectives. The images were taken using the same confocal settings for each  
467 set of experiments. All the experiments were repeated at least 3 times.

#### 468 **Auxin transport assay**

469 Five-day-old vertically grown *Arabidopsis* seedlings were used for auxin transport assay.  
470 Auxin transport was measured as described earlier (Shibasaki et al., 2009). In brief, a donor drop  
471 was prepared by mixing  $0.5\ \mu\text{M}$  [ $^3\text{H}$ ] IAA ( $3.7\ \text{MBq ml}^{-1}$ ) in 1.5% agar containing MES buffer  
472 solution. The donor drop was placed on the edge of the root tip for the shootward auxin transport  
473 assay or at the root-shoot junction for the rootward transport assay. Plates were then incubated  
474 vertically at  $23^{\circ}\text{C}$  for 2h for shootward auxin transport assay and 6h for rootward auxin transport  
475 assay. For measurement of auxin transport, 5-mm root segments away from the apical 2 mm root  
476 tip and 2 mm away from the root-shoot junction were carefully cut and soaked overnight in 4 ml  
477 of liquid scintillation fluid (Ultima Gold, PerkinElmer, USA), and the radioactivity was measured  
478 with a scintillation counter (model LS6500, Beckman ACSII; USA Instruments, Fullerton, CA).  
479 Data were obtained from at least three biological replicates.

#### 480 **Gene expression analysis**



481 RNA was extracted from 5-day-old vertically grown *Arabidopsis thaliana* seedlings root  
482 tissue using RNeasy Mini Kit (Qiagen, [www.qiagen.com](http://www.qiagen.com)) with on-column DNA digestion to  
483 remove residual genomic DNA using RNase-free DNase according to manufacturer's protocol.  
484 Extracted RNA was tested for quality and quantity. Each RNA concentration was normalized with  
485 RNase free water. 500 ng RNA was used to synthesize cDNA using Rever Tra Ace qPCR RT  
486 master mix (Toyobo, Japan, [www.toyobo-global.com](http://www.toyobo-global.com)). Quantitative PCR reactions were  
487 performed using the Takara TP-850 thermal cycler (Takara Bio, Japan, [www.takara-bio.com](http://www.takara-bio.com)) and  
488 THUNDERBIRDTM SYBR® qPCR Mix from Toyobo (<https://www.toyobo.co.jp>). The reaction  
489 was performed as per manufacturer's instruction. For quantification of gene expression, we used  
490 the  $2^{-\Delta\Delta CT}$  (cycle threshold) method (Livak and Schmittgen, 2001) with a normalization to the  
491 *efl*  $\alpha$  expression. Data were obtained from three biological replicates. Primers used for the gene  
492 expression analysis are listed in Supplemental Table 1.

### 493 **Statistical analysis**

494 Results are expressed as the means  $\pm$  SE from the appropriate number of experiments. A  
495 two-tailed Student's *t*-test was used to analyze statistical significance.

### 496 **Acknowledgements**

497 The authors thank Jose Alonso (University of North Carolina, Raleigh, USA), B. Scherers  
498 (University of Utrecht, The Netherlands), E.B. Blancaflor (Samuel Roberts Noble Foundation,  
499 Ardmore, OK, USA), Malcolm Bennett (University of Nottingham, UK). This work was funded  
500 by JSPS Kakenhi (Grant Number 23012003 A.R.). We thank Michiko Saito for technical  
501 assistance.

### 502 **Author Contribution**

503 A.R., A.A.R. designed the experiments. T.N. and K.S. performed the plant experiments  
504 and cloning of the genes. A.R. supervised the experiments. A.R., T.N., and K.S. analyzed the data.  
505 A.R. and A.A.R. wrote the manuscript.

### 506 **References**

507 **Abel S, Theologis A** (1996) Early genes and auxin action. *Plant Physiol* **111**: 9–17

- 508 **Alonso JM** (1999) EIN2, a Bifunctional Transducer of Ethylene and Stress Responses in  
509 Arabidopsis. *Science* (80 ) **284**: 2148–2152
- 510 **Baluška F, Jasik J, Edelmann HG, Salajová T, Volkmann D** (2001) Latrunculin B-Induced  
511 Plant Dwarfism: Plant Cell Elongation Is F-Actin-Dependent. *Dev Biol* **231**: 113–124
- 512 **Barton MK** (2010) Twenty years on: The inner workings of the shoot apical meristem, a  
513 developmental dynamo. *Dev Biol* **341**: 95–113
- 514 **Baskin TI, Wilson JE** (1997) Inhibitors of Protein Kinases and Phosphatases Alter Root  
515 Morphology and Disorganize Cortical Microtubules. *Plant Physiol* **113**: 493–502
- 516 **Beemster GTS, Baskin TI** (1998) Analysis of Cell Division and Elongation Underlying the  
517 Developmental Acceleration of Root Growth in *Arabidopsis thaliana*. *Plant Physiol* **116**:  
518 1515–1526
- 519 **Benková E, Michniewicz M, Sauer M, Teichmann T, Seifertová D, Jürgens G, Friml J**  
520 (2003) Local, Efflux-Dependent Auxin Gradients as a Common Module for Plant Organ  
521 Formation. *Cell* **115**: 591–602
- 522 **Bertell G, Eliasson L** (1992) Cytokinin effects on root growth and possible interactions with  
523 ethylene and indole-3-acetic acid. *Physiol Plant* **84**: 255–261
- 524 **Brumos J, Robles LM, Yun J, Vu TC, Jackson S, Alonso JM, Stepanova AN** (2018) Local  
525 Auxin Biosynthesis Is a Key Regulator of Plant Development. *Dev Cell* **47**: 306-318.e5
- 526 **Chapman EJ, Estelle M** (2009) Cytokinin and auxin intersection in root meristems. *Genome*  
527 *Biol* **10**: 210
- 528 **Clayton L, Lloyd CW** (1985) Actin organization during the cell cycle in meristematic plant  
529 cells. *Exp Cell Res* **156**: 231–238
- 530 **Dello Ioio R, Linhares FS, Sabatini S** (2008a) Emerging role of cytokinin as a regulator of  
531 cellular differentiation. *Curr Opin Plant Biol* **11**: 23–27
- 532 **Dello Ioio R, Linhares FS, Scacchi E, Casamitjana-Martinez E, Heidstra R, Costantino P,**  
533 **Sabatini S** (2007) Cytokinins Determine Arabidopsis Root-Meristem Size by Controlling

- 534 Cell Differentiation. *Curr Biol* **17**: 678–682
- 535 **Dello Ioio R, Nakamura K, Moubayidin L, Perilli S, Taniguchi M, Morita MT, Aoyama T,**  
536 **Costantino P, Sabatini S** (2008b) A genetic framework for the control of cell division and  
537 differentiation in the root meristem. *Science* (80- ) **322**: 1380–1384
- 538 **Feraru E, Friml J** (2008) PIN Polar Targeting. *Plant Physiol* **147**: 1553–1559
- 539 **Friml J** (2003) Auxin transport — shaping the plant. *Curr Opin Plant Biol* **6**: 7–12
- 540 **Geldner N, Friml J, Stierhof Y-D, Jürgens G, Palme K** (2001) Auxin transport inhibitors  
541 block PIN1 cycling and vesicle trafficking. *Nature* **413**: 425–428
- 542 **Gilliland LU, Kandasamy MK, Pawloski LC, Meagher RB** (2002) Both vegetative and  
543 reproductive actin isoforms complement the stunted root hair phenotype of the  
544 *Arabidopsis act2-1* mutation. *Plant Physiol* **130**: 2199–2209
- 545 **Gilliland LU, Pawloski LC, Kandasamy MK, Meagher RB** (2003) *Arabidopsis* actin gene  
546 *ACT7* plays an essential role in germination and root growth. *Plant J* **33**: 319–328
- 547 **Grieneisen VA, Xu J, Marée AFM, Hogeweg P, Scheres B** (2007) Auxin transport is sufficient  
548 to generate a maximum and gradient guiding root growth. *Nature* **449**: 1008–1013
- 549 **Guo H, Ecker JR** (2004) The ethylene signaling pathway: new insights. *Curr Opin Plant Biol* **7**:  
550 40–49
- 551 **Huang J-D, Brady ST, Richards BW, Stenoien D, Resau JH, Copeland NG, Jenkins NA**  
552 (1999) Direct interaction of microtubule- and actin-based transport motors. *Nature* **397**:  
553 267–270
- 554 **Kandasamy MK, Burgos-Rivera B, McKinney EC, Ruzicka DR, Meagher RB** (2007) Class-  
555 specific interaction of profilin and ADF isoforms with actin in the regulation of plant  
556 development. *Plant Cell* **19**: 3111–3126
- 557 **Kandasamy MK, Gilliland LU, McKinney EC, Meagher RB** (2001) One plant actin  
558 isoform, *ACT7*, is induced by auxin and required for normal callus formation. *Plant Cell*  
559 **13**: 1541–1554

- 560 **Kandasamy MK, McKinney EC, Meagher RB** (2009) A single vegetative actin isovariant  
561 overexpressed under the control of multiple regulatory sequences is sufficient for normal  
562 Arabidopsis development. *Plant Cell* **21**: 701–18
- 563 **Kim H, Park M, Soo JK, Hwang I** (2005) Actin filaments play a critical role in vacuolar  
564 trafficking at the Golgi complex in plant cells. *Plant Cell* **17**: 888–902
- 565 **Kleine-Vehn J, Friml J** (2008) Polar Targeting and Endocytic Recycling in Auxin-Dependent  
566 Plant Development. *Annu Rev Cell Dev Biol* **24**: 447–473
- 567 **Kleine-Vehn J, Leitner J, Zwiewka M, Sauer M, Abas L, Luschnig C, Friml J** (2008)  
568 Differential degradation of PIN2 auxin efflux carrier by retromer-dependent vacuolar  
569 targeting. *Proc Natl Acad Sci U S A* **105**: 17812–17817
- 570 **Lewis DR, Negi S, Sukumar P, Muday GK** (2011) Ethylene inhibits lateral root development,  
571 increases IAA transport and expression of PIN3 and PIN7 auxin efflux carriers.  
572 *Development* **138**: 3485–3495
- 573 **Liu Y, Xu M, Liang N, Zheng Y, Yu Q, Wu S** (2017) Symplastic communication spatially  
574 directs local auxin biosynthesis to maintain root stem cell niche in Arabidopsis. *Proc Natl*  
575 *Acad Sci U S A* **114**: 4005–4010
- 576 **Livak KJ, Schmittgen TD** (2001) Analysis of Relative Gene Expression Data Using Real-Time  
577 Quantitative PCR and the  $2^{-\Delta\Delta CT}$  Method. *Methods* **25**: 402–408
- 578 **Lloyd CW** (1991) How does the cytoskeleton read the laws of geometry in aligning the division  
579 plane of plant cells? *Development* **112**: 55–65
- 580 **Luschnig C, Gaxiola RA, Grisafi P, Fink GR** (1998) EIR1, a root-specific protein involved in  
581 auxin transport, is required for gravitropism in Arabidopsis thaliana. *Genes Dev* **12**: 2175–  
582 2187
- 583 **McDowell JM, An YQ, Huang S, McKinney EC, Meagher RB** (1996) The arabidopsis ACT7  
584 actin gene is expressed in rapidly developing tissues and responds to several external  
585 stimuli. *Plant Physiol* **111**: 699–711

- 586 **McLean BG, Huang S, McKinney EC, Meagher RB** (1990) Plants contain highly divergent  
587 actin isoforms. *Cell Motil Cytoskeleton* **17**: 276–290
- 588 **Meagher RB** (1991) Divergence and Differential Expression of Actin Gene Families in Higher  
589 Plants. *Int Rev Cytol* **125**: 139–163
- 590 **Moubayidin L, Perilli S, Dello Ioio R, Di Mambro R, Costantino P, Sabatini S** (2010) The  
591 rate of cell differentiation controls the arabidopsis root meristem growth phase. *Curr Biol*  
592 **20**: 1138–1143
- 593 **Muday GK, Murphy AS** (2002) An emerging model of auxin transport regulation. *Plant Cell*  
594 **14**: 293–299
- 595 **Muday GK, Rahman A, Binder BM** (2012) Auxin and ethylene: Collaborators or competitors?  
596 *Trends Plant Sci* **17**: 181–195
- 597 **Muller B, Sheen J** (2007) Arabidopsis Cytokinin Signaling Pathway. *Sci STKE* **2007**: 1–5
- 598 **Müller B, Sheen J** (2007) Arabidopsis cytokinin signaling pathway. *Sci STKE* **2007**: 1–5
- 599 **Nebenführ A, Staehelin LA** (2001) Mobile factories: Golgi dynamics in plant cells. *Trends*  
600 *Plant Sci* **6**: 160–167
- 601 **Nishimura T, Yokota E, Wada T, Shimmen T, Okada K** (2003) An Arabidopsis ACT2  
602 Dominant-Negative Mutation, which Disturbs F-actin Polymerization, Reveals its  
603 Distinctive Function in Root Development. *Plant Cell Physiol* **44**: 1131–1140
- 604 **Okamoto T, Tsurumi S, Shibasaki K, Obana Y, Takaji H, Oono Y, Rahman A** (2008)  
605 Genetic dissection of hormonal responses in the roots of Arabidopsis grown under  
606 continuous mechanical impedance. *Plant Physiol* **146**: 1651–1662
- 607 **Ortega-Martínez O, Pernas M, Carol RJ, Dolan L** (2007) Ethylene modulates stem cell  
608 division in the Arabidopsis thaliana root. *Science* **317**: 507–10
- 609 **Pollard TD, Cooper JA** (2009) Actin, a central player in cell shape and movement. *Science*  
610 (80- ) **326**: 1208–1212

- 611 **Rahman A** (2013) Auxin: A regulator of cold stress response. *Physiol Plant* **147**: 28–35
- 612 **Rahman A, Amakawa T, Goto N, Tsurumi S** (2001) Auxin is a positive regulator for ethylene-  
613 mediated response in the growth of arabidopsis roots. *Plant Cell Physiol* **42**: 301–307
- 614 **Rahman A, Bannigan A, Sulaman W, Pechter P, Blancaflor EB, Baskin TI** (2007) Auxin,  
615 actin and growth of the *Arabidopsis thaliana* primary root. *Plant J* **50**: 514–528
- 616 **Rahman A, Hosokawa S, Oono Y, Amakawa T, Goto N, Tsurumi S** (2002) Auxin and  
617 ethylene response interactions during *Arabidopsis* root hair development dissected by auxin  
618 influx modulators. *Plant Physiol* **130**: 1908–1917
- 619 **Ringli C, Baumberger N, Diet A, Frey B, Keller B** (2002) ACTIN2 is essential for bulge site  
620 selection and tip growth during root hair development of arabidopsis. *Plant Physiol* **129**:  
621 1464–1472
- 622 **Růžicka K, Ljung K, Vanneste S, Podhorská R, Beeckman T, Friml J, Benková E** (2007)  
623 Ethylene regulates root growth through effects on auxin biosynthesis and transport-  
624 dependent auxin distribution. *Plant Cell* **19**: 2197–2212
- 625 **Růžicka K, Šimášková M, Duclercq J, Petrášek J, Zažímalová E, Simon S, Friml J, Van  
626 Montagu MCE, Benková E** (2009) Cytokinin regulates root meristem activity via  
627 modulation of the polar auxin transport. *Proc Natl Acad Sci U S A* **106**: 4284–4289
- 628 **Shibasaki K, Uemura M, Tsurumi S, Rahman A** (2009) Auxin response in *Arabidopsis* under  
629 cold stress: underlying molecular mechanisms. *Plant Cell* **21**: 3823–3838
- 630 **Silk WK, Lord EM, Eckard KJ** (1989) Growth Patterns Inferred from Anatomical Records.  
631 *Plant Physiol* **90**: 708–713
- 632 **Simon VR, Pon LA** (1996) Actin-based organelle movement. *Experientia* **52**: 1117–1122
- 633 **Smith LG, Oppenheimer DG** (2005) Spatial control of cell expansion by the plant  
634 cytoskeleton. *Annu Rev Cell Dev Biol* **21**: 271–295
- 635 **Staiger CJ, Blanchoin L** (2006) Actin dynamics: old friends with new stories. *Curr Opin Plant  
636 Biol* **9**: 554–62

- 637 **Staiger CJ, Schliwa M** (1987) Actin localization and function in higher plants. *Protoplasma*  
638 **141**: 1–12
- 639 **Stepanova AN, Hoyt JM, Hamilton AA, Alonso JM** (2005) A link between ethylene and auxin  
640 uncovered by the characterization of two root-specific ethylene-insensitive mutants in  
641 arabidopsis. *Plant Cell* **17**: 2230–2242
- 642 **Stepanova AN, Robertson-Hoyt J, Yun J, Benavente LM, Xie DY, Doležal K, Schlereth A,**  
643 **Jürgens G, Alonso JM** (2008) TAA1-Mediated Auxin Biosynthesis Is Essential for  
644 Hormone Crosstalk and Plant Development. *Cell* **133**: 177–191
- 645 **Stepanova AN, Yun J, Likhacheva A V, Alonso JM** (2007) Multilevel interactions between  
646 ethylene and auxin in Arabidopsis roots. *Plant Cell* **19**: 2169–2185
- 647 **Street IH, Aman S, Zubo Y, Ramzan A, Wang X, Shakeel SN, Kieber JJ, Eric Schaller G**  
648 (2015) Ethylene inhibits cell proliferation of the arabidopsis root meristem. *Plant Physiol*  
649 **169**: 338–350
- 650 **Swarup R, Perry P, Hagenbeek D, Van Der Straeten D, Beemster GTS, Sandberg G,**  
651 **Bhalerao R, Ljung K, Bennett MJ** (2007) Ethylene upregulates auxin biosynthesis in  
652 Arabidopsis seedlings to enhance inhibition of root cell elongation. *Plant Cell* **19**: 2186–  
653 2196
- 654 **Tian Q, Reed JW** (1999) Control of auxin-regulated root development by the Arabidopsis  
655 thaliana SHY2/IAA3 gene. *Development* **126**: 711–21
- 656 **Vaškebová L, Šamaj J, Ovecka M** (2018) Single-point ACT2 gene mutation in the Arabidopsis  
657 root hair mutant der1-3 affects overall actin organization, root growth and plant  
658 development. *Ann Bot* **122**: 889–901
- 659 **Wang Y-S, Yoo C-M, Blancaflor EB** (2007) Improved imaging of actin filaments in transgenic  
660 Arabidopsis plants expressing a green fluorescent protein fusion to the C- and N-termini of  
661 the fimbrin actin-binding domain 2. *New Phytol* **177**: 071120093824004-???
- 662 **Xu J, Scheres B** (2005) Dissection of Arabidopsis ADP-RIBOSYLATION FACTOR 1 function  
663 in epidermal cell polarity. *Plant Cell* **17**: 525–536

664 **Zhu J, Bailly A, Zwiewka M, Sovero V, Di Donato M, Ge P, Oehri J, Aryal B, Hao P,**  
665 **Linnert M, et al** (2016) TWISTED DWARF1 Mediates the Action of Auxin Transport  
666 Inhibitors on Actin Cytoskeleton Dynamics. *Plant Cell* **28**: 930–948

667

668

## 669 **Figure Legends**

670 **Figure 1.** Effect of loss of Actin isovariant proteins on intracellular actin organization.

671 Upper panel (A-F) chemical fixation. Lower panel (G-L) live cell imaging. The images are  
672 representative of at least three fixation runs, with 5–7 roots per genotype in each run. Five-day old  
673 *Arabidopsis* roots were fixed (for chemical fixation) or mounted in liquid growth medium on a  
674 cover glass (for live cell imaging) and actin was localized using confocal laser microscopy. The  
675 images were obtained from the elongation zone of the root and imaged using the same confocal  
676 settings for immunostaining and live cell imaging respectively. Images are projections of 10–12  
677 optical sections. Bars=10  $\mu$ m for upper panel and 20  $\mu$ m for lower panel.

678

679 **Figure 2.** ACT7 plays an important role in determining primary root development and meristem  
680 size.

681 (A) Seven-day old seedling phenotype of actin single and double mutants. Loss of ACT7  
682 drastically affects the seedling phenotype, including primary root growth. (B-C) Image and the  
683 size of the primary root meristem in actin isovariant mutants. For root meristem imaging, seven-  
684 day old seedlings were stained in 2 $\mu$ M FM 4-64 for 15 minute and subjected to imaging using  
685 confocal laser microscope using the same settings. Images and data are representative of at least  
686 3-4 biological replicates. Vertical bars represent mean  $\pm$  SE of the experimental means from  
687 obtained from at least 3 experiments (n= 3 or more), where experimental means were obtained  
688 from 6-8 seedlings per treatment. Asterisks represent the statistical significance between wild-type  
689 and mutants as judged by the Student's *t*-test (\*P<0.5, \*\*P<0.01, \*\*\*P< 0.001). Bars, 5 mm (A);  
690 50  $\mu$ m (B).

691

692 **Figure 3.** Loss of ACT7 but not ACT2 and ACT8 affects the intracellular dynamic cycling of  
693 PIN1.

694 Seven-day old PIN1:PIN1-GFP transgenic seedlings in wild-type and actin single and double  
695 mutant background were subjected to confocal imaging. The images were captured using the same  
696 confocal settings and are representative of 20 roots from three- four independent experiments.  
697 Lower panel represents the zoomed images. The intracellular agglomeration of PIN1, indicated by  
698 arrowheads, was observed exclusively in *act7* and *act7act8* mutants. Bars represent 10  $\mu$ m.



699 **Figure 4.** Loss of ACT7 but not ACT2 and ACT8 affects the intracellular dynamic cycling of  
700 PIN2.

701 Seven-day old PIN2:PIN2-GFP transgenic seedlings in wild-type and actin single and double  
702 mutant background were subjected to confocal imaging. The images were captured using the same  
703 confocal settings and are representative of 25 roots from three- four independent experiments.  
704 Upper and middle panel represent the images from the root meristem region. Lower panel  
705 represents the images from transition zone. The intracellular agglomeration of PIN2 was observed  
706 exclusively in the meristematic region of *act7* and *act7act8* mutants but not in the transition zone  
707 (Bottom Panel). Bars represent 10  $\mu\text{m}$ .

708 **Figure 5.** Effect of loss of ACT7 on PIN4, PIN7 and AUX1 expression

709 Seven-day old PIN7:PIN7-GFP, PIN4:PIN4-GFP, and AUX1-YFP transgenic seedlings in wild-  
710 type and actin single and double mutant background were subjected to confocal imaging. The  
711 images were captured using the same confocal settings and are representative of 20 roots from  
712 three- four independent experiments. PIN7 expression was slightly reduced only in *act7act8*  
713 mutants. PIN4 and AUX1 expression was unaltered in *act7* and *act7act8* mutants. Bars represent  
714 10 mm. Bars represent 50  $\mu\text{m}$ , and 10  $\mu\text{m}$  for zoomed images of AUX1.

715

716 **Figure 6.** Effect of loss of actin isovariant on the root auxin gradient formation

717 Five-day old *DR5-GUS* and *IAA2-GUS* transgenic seedlings in wild-type and actin single and  
718 double mutant background were subjected to GUS staining. *DR5-GUS* transgenic seedlings were  
719 stained in buffer containing 1 mM X- gluc for 3 h and *IAA2-GUS* were stained for 1 h at 37°C.  
720 After the incubation, the roots were cleared for photography. Loss of ACT7 results in formation  
721 of reduced auxin gradient at root tip. Loss of both ACT7 and ACT8 further enhances the  
722 reduction. For exogenous auxin treatment the seedlings were incubated in 1 $\mu\text{M}$  IAA for 3h and  
723 subjected to GUS staining and cell clearing. The images are representative of 20 seedlings from  
724 three-four independent experiments. The results were confirmed with two separate lines for each  
725 crossing. Bars represent 100  $\mu\text{m}$ .

726 **Figure 7.** Auxin transport is disrupted in *act7* mutant.

727 Shootward and rootward auxin transport were measured using five-day-old seedlings. The  
728 experiments were performed in triplicate and repeated at least three times. Auxin influx facilitator  
729 mutant *aux1-7* was used as positive control. Asterisks represent the statistical significance between  
730 wild-type and mutants as judged by the Student's *t*-test (\* $P < 0.5$ , \*\* $P < 0.01$ ).

731

732 **Figure 8.** Molecular analysis of ethylene response in *act7* and *act7act8* mutants.

733 (A) Ectopic expression of ethylene-induced auxin biosynthesis gene *ANTHRANILATE*  
734 *SYNTHASE  $\beta 1$*  in the mutants. The expression is reduced at the root tip but stimulated in the  
735 elongation zone. The images are representative of 20 seedlings from three independent  
736 experiments. Bars represent 50  $\mu\text{m}$ .

737

738 (B-D) Expression analysis of the ethylene signaling genes in *act7* and *act7act8* mutants. qRT-PCR  
739 was performed using cDNA prepared from the root samples of five-day-old seedlings. All the data  
740 were normalized against *efl*  $\alpha$ . The data were obtained from three independent biological replicates.  
741 Asterisk represents the statistical significance between wild-type and mutants as judged by the  
742 Student's *t*-test (\* $P < 0.5$ ).

743

744 **Figure 9.** Molecular analysis of cytokinin responsive genes in *act7* and *act7act8* mutants.

745 (A) Expression analysis of the *ARR1*, *ARR12* and *SHY2/IAA3* in *act7* and *act7act8* mutants. qRT-  
746 PCR was performed using cDNA prepared from the root samples of five-day-old seedlings. All  
747 the data were normalized against *efl*  $\alpha$ . The data were obtained from three independent biological  
748 replicates. Asterisk represents the statistical significance between wild-type and mutants as judged  
749 by the Student's *t*-test (\*\* $P < 0.01$ ).

750 (B) Expression of synthetic cytokinin marker *TCS-GFP* is not altered in *act7* and *act7act8*  
751 mutants. The images are representative of 20 seedlings from three independent experiments. Bar  
752 represents 50  $\mu\text{m}$ .

753

754

755

756

757

758

759

760

761

762

763

764

765

766

767

768 **Table 1:** Actin isovariant ACT7 is the primary regulator of root elongation, cell length and cell  
769 production in Arabidopsis

| Genotype        | Primary root elongation (mm) | Cell length ( $\mu\text{m}$ ) | Cell production rate |
|-----------------|------------------------------|-------------------------------|----------------------|
| Col-0           | 9.05 $\pm$ 0.03              | 166 $\pm$ 1.5                 | 54.0 $\pm$ 2.2       |
| <i>act2-1</i>   | 9.90 $\pm$ 0.21              | 157 $\pm$ 0.29*               | 62.0 $\pm$ 0.3*      |
| <i>act7-4</i>   | 3.39 $\pm$ 0.21***           | 87 $\pm$ 5.34***              | 39.5 $\pm$ 2.2***    |
| <i>act8-2</i>   | 8.90 $\pm$ 0.16              | 166 $\pm$ 6.8                 | 52.4 $\pm$ 1.3       |
| <i>act2act8</i> | 9.09 $\pm$ 0.60              | 159 $\pm$ 2.08                | 61.5 $\pm$ 2.3       |
| <i>act7act8</i> | 1.8 $\pm$ 0.02***            | 68 $\pm$ 7.23***              | 26.8 $\pm$ 2.2***    |

770

771 Data are means  $\pm$  S.E of three replicate experiments. 4-day-old vertically grown seedlings  
772 were transferred to new plates and grown for another three days. The measurements reflect the  
773 behavior over the third day of treatment. Asterisks represent the statistical significance between  
774 wild-type and mutants as judged by the Student's *t*-test (\* $P$ <0.5, \*\*\* $P$ < 0.001).

775

776

777

778

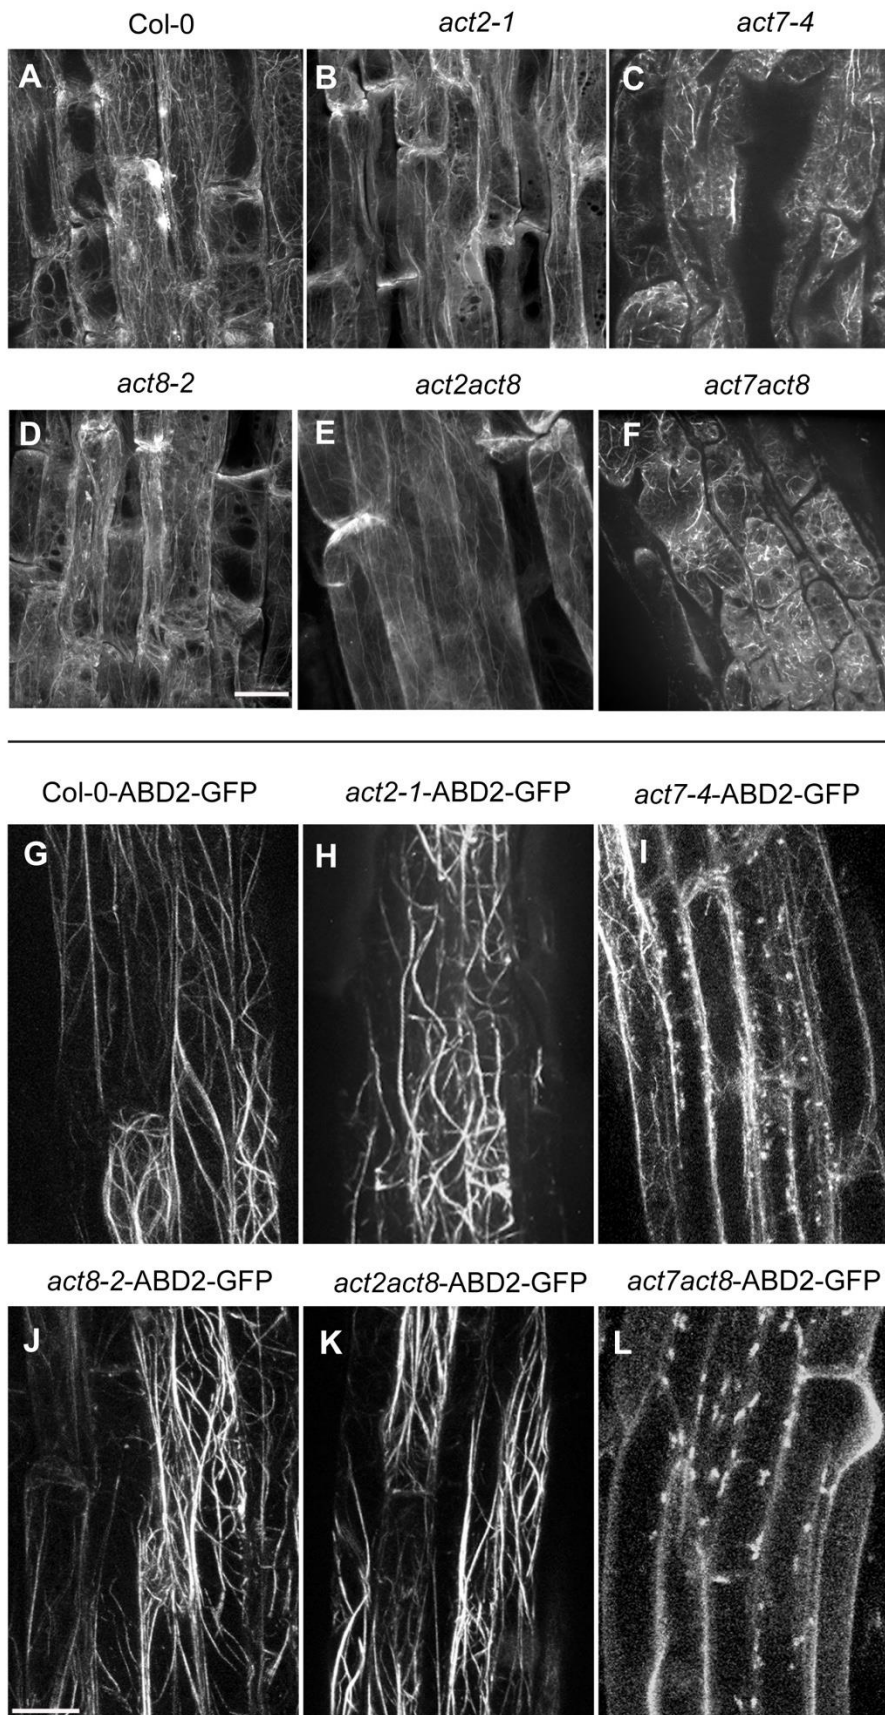

**Figure 1.**

Effect of loss of Actin isovariant proteins on intracellular actin organization. Upper panel (A-F) chemical fixation. Lower panel (G-L) live cell imaging. The images are representative of at least three fixation runs, with 5–7 roots per genotype in each run. Five-day old Arabidopsis roots were fixed (for chemical fixation) or mounted in liquid growth medium on a cover glass (for live cell imaging) and actin was localized using confocal laser microscopy. The images were obtained from the elongation zone of the root and imaged using the same confocal settings for immunostaining and live cell imaging respectively. Images are projections of 10–12 optical sections. Bars=10  $\mu$ m for upper panel and 20  $\mu$ m for lower panel.

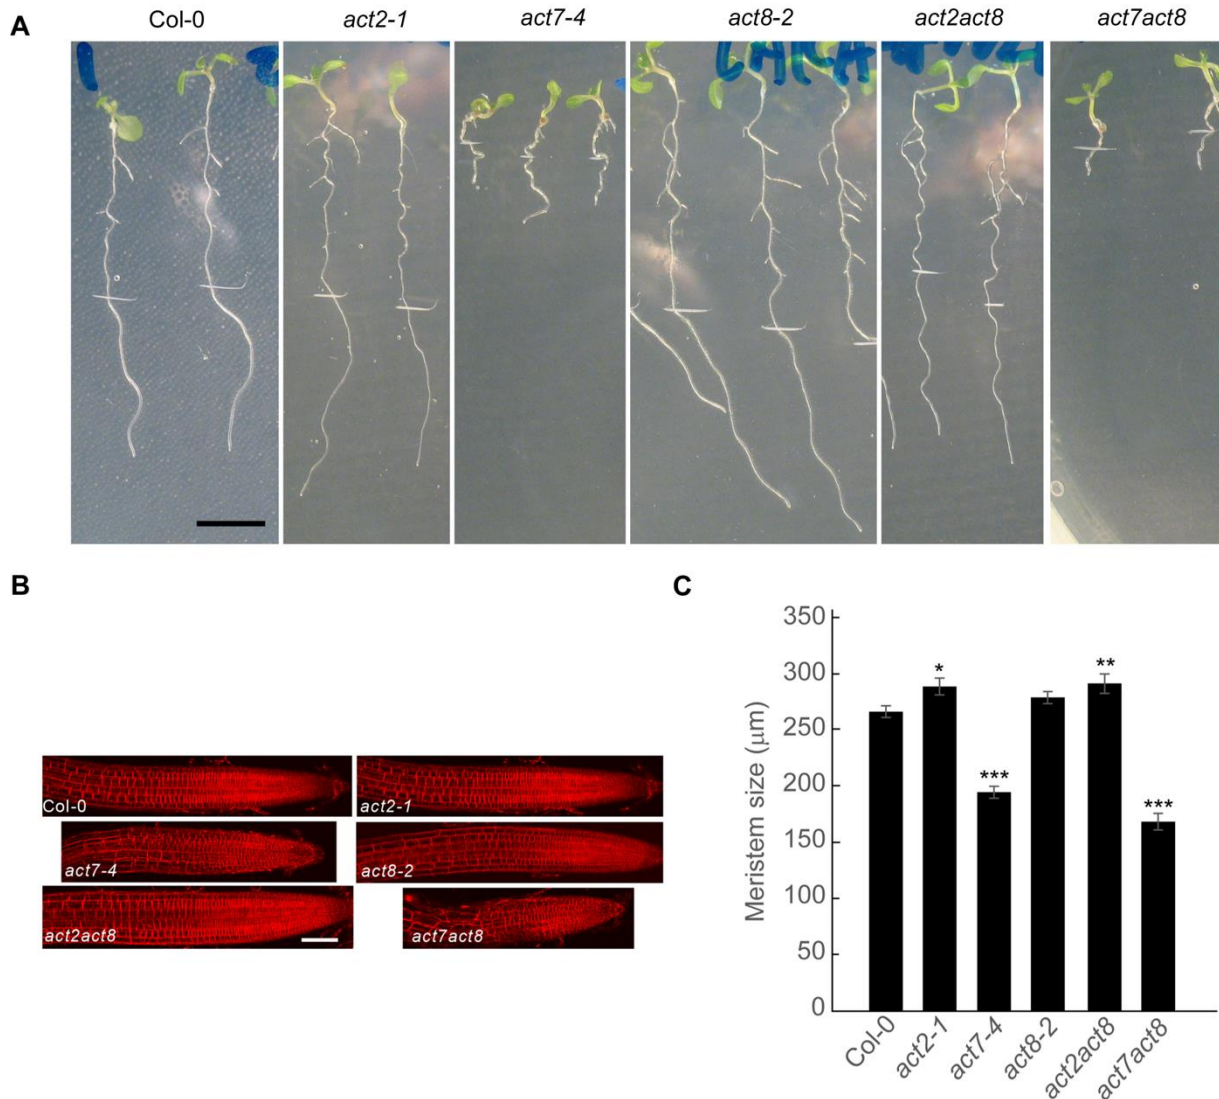

818

819 **Figure 2.** ACT7 plays an important role in determining primary root development and meristem  
820 size.

821 (A) Seven-day old seedling phenotype of actin single and double mutants. Loss of ACT7  
822 drastically affects the seedling phenotype, including primary root growth. (B-C) Image and the  
823 size of the primary root meristem in actin isovariant mutants. For root meristem imaging, seven-  
824 day old seedlings were stained in 2μM FM 4-64 for 15 minute and subjected to imaging using  
825 confocal laser microscope using the same settings. Images and data are representative of at least  
826 3-4 biological replicates. Vertical bars represent mean ± SE of the experimental means from  
827 obtained from at least 3 experiments (n=3 or more), where experimental means were obtained from  
828 6-8 seedlings per treatment. Asterisks represent the statistical significance between wild-type and  
829 mutants as judged by the Student's *t*-test (\*P<0.5, \*\*P<0.01, \*\*\*P< 0.001). Bars, 5 mm (A); 50  
830 μm (B).

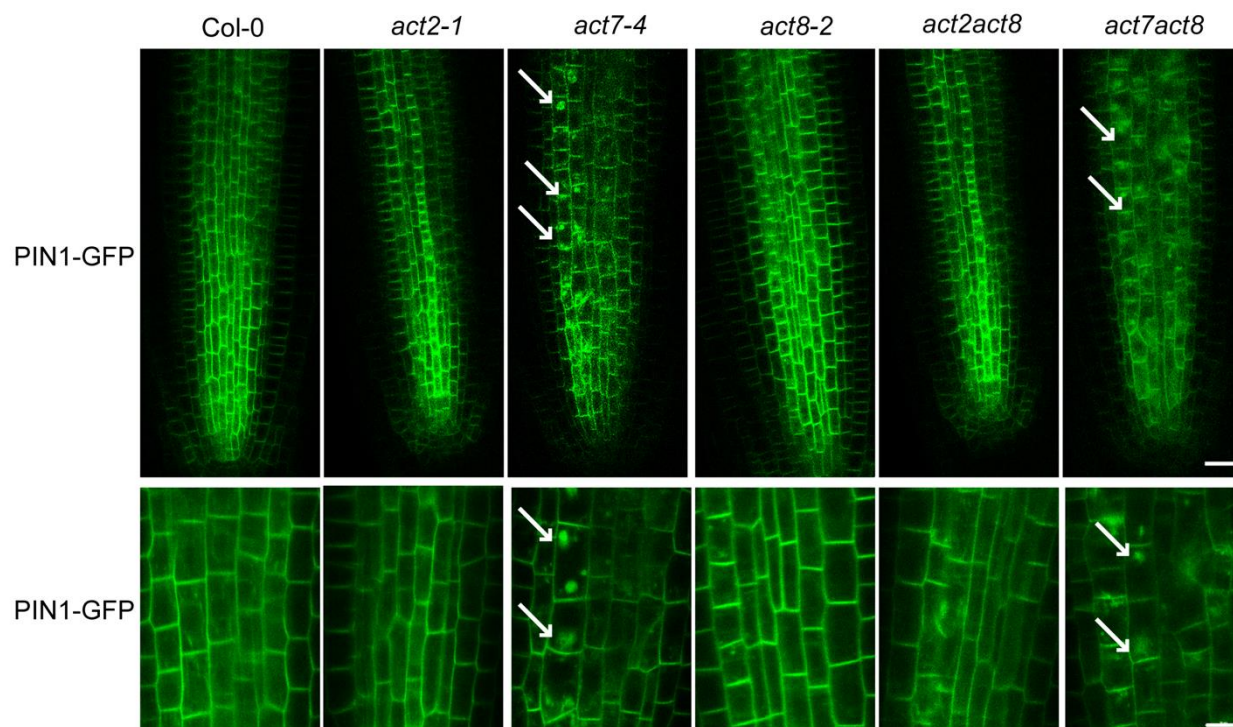

831

832 **Figure 3.** Loss of ACT7 but not ACT2 and ACT8 affects the intracellular dynamic cycling of  
833 PIN1.

834 Seven-day old PIN1:PIN1-GFP transgenic seedlings in wild-type and actin single and double  
835 mutant background were subjected to confocal imaging. The images were captured using the same  
836 confocal settings and are representative of 20 roots from three- four independent experiments.  
837 Lower panel represents the zoomed images. The intracellular agglomeration of PIN1, indicated by  
838 arrowheads, was observed exclusively in *act7* and *act7act8* mutants. Bars represent 10  $\mu$ m.

839

840

841

842

843

844

845

846

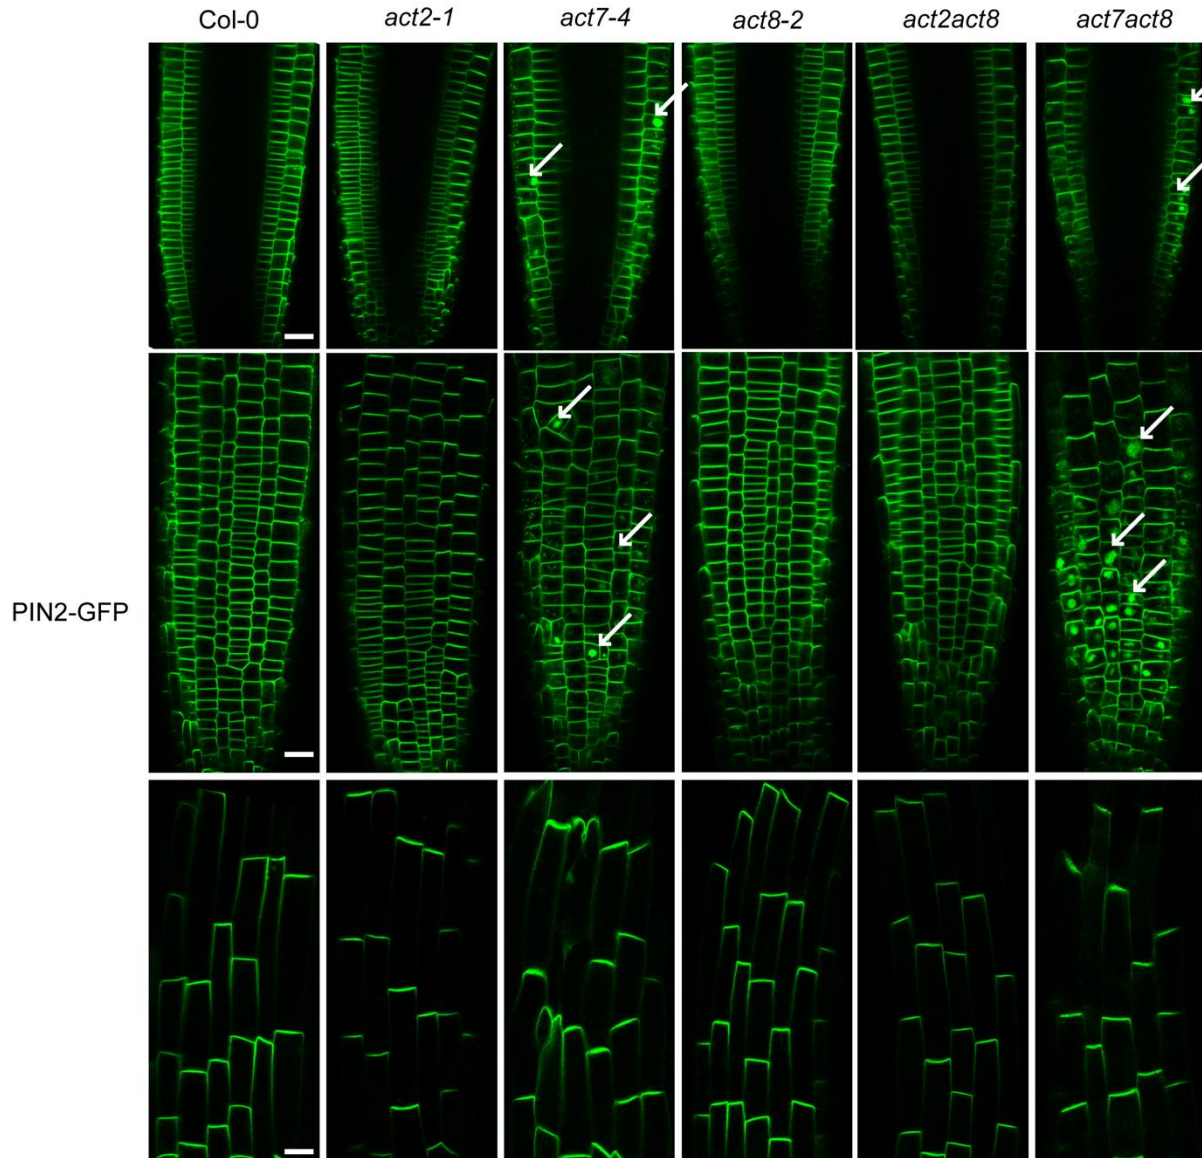

847

848 **Figure 4.** Loss of ACT7 but not ACT2 and ACT8 affects the intracellular dynamic cycling of  
849 PIN2.

850 Seven-day old PIN2:PIN2-GFP transgenic seedlings in wild-type and actin single and double  
851 mutant background were subjected to confocal imaging. The images were captured using the same  
852 confocal settings and are representative of 25 roots from three- four independent experiments.  
853 Upper and middle panel represent the images from the root meristem region. Lower panel  
854 represents the images from transition zone. The intracellular agglomeration of PIN2 was observed  
855 exclusively in the meristematic region of *act7* and *act7act8* mutants but not in the transition zone  
856 (Bottom Panel). Bars represent 10  $\mu$ m.

857

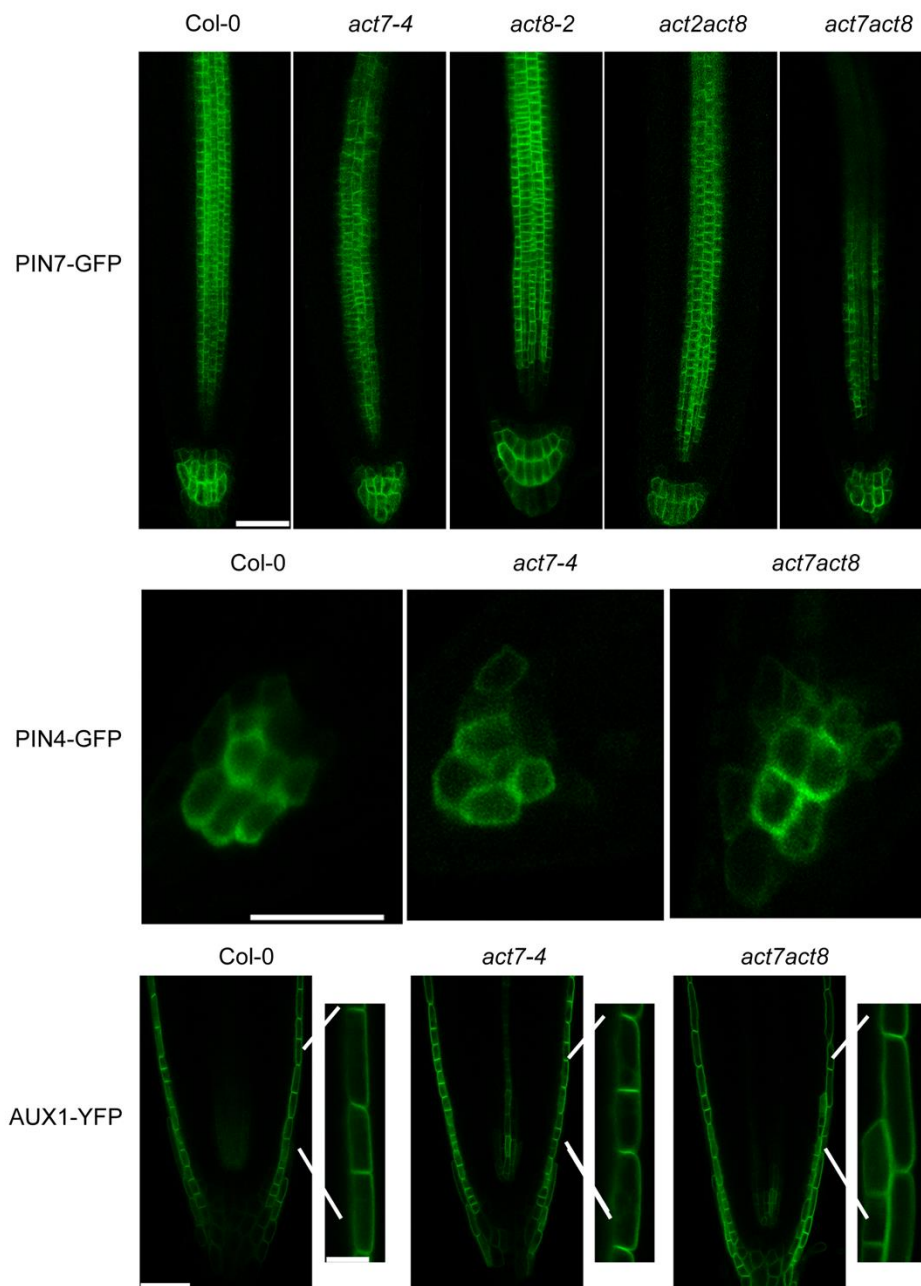

877

878 **Figure 5.** Effect of loss of ACT7 on PIN4, PIN7 and AUX1 expression

879 Seven-day old PIN7:PIN7-GFP, PIN4:PIN4-GFP, and AUX1-YFP transgenic seedlings in wild-  
880 type and actin single and double mutant background were subjected to confocal imaging. The  
881 images were captured using the same confocal settings and are representative of 20 roots from  
882 three- four independent experiments. PIN7 expression was slightly reduced only in *act7act8*  
883 mutants. PIN4 and AUX1 expression was unaltered in *act7* and *act7act8* mutants. Bars represent  
884 10 mm. Bars represent 50  $\mu$ m, and 10  $\mu$ m for zoomed images of AUX1.



885

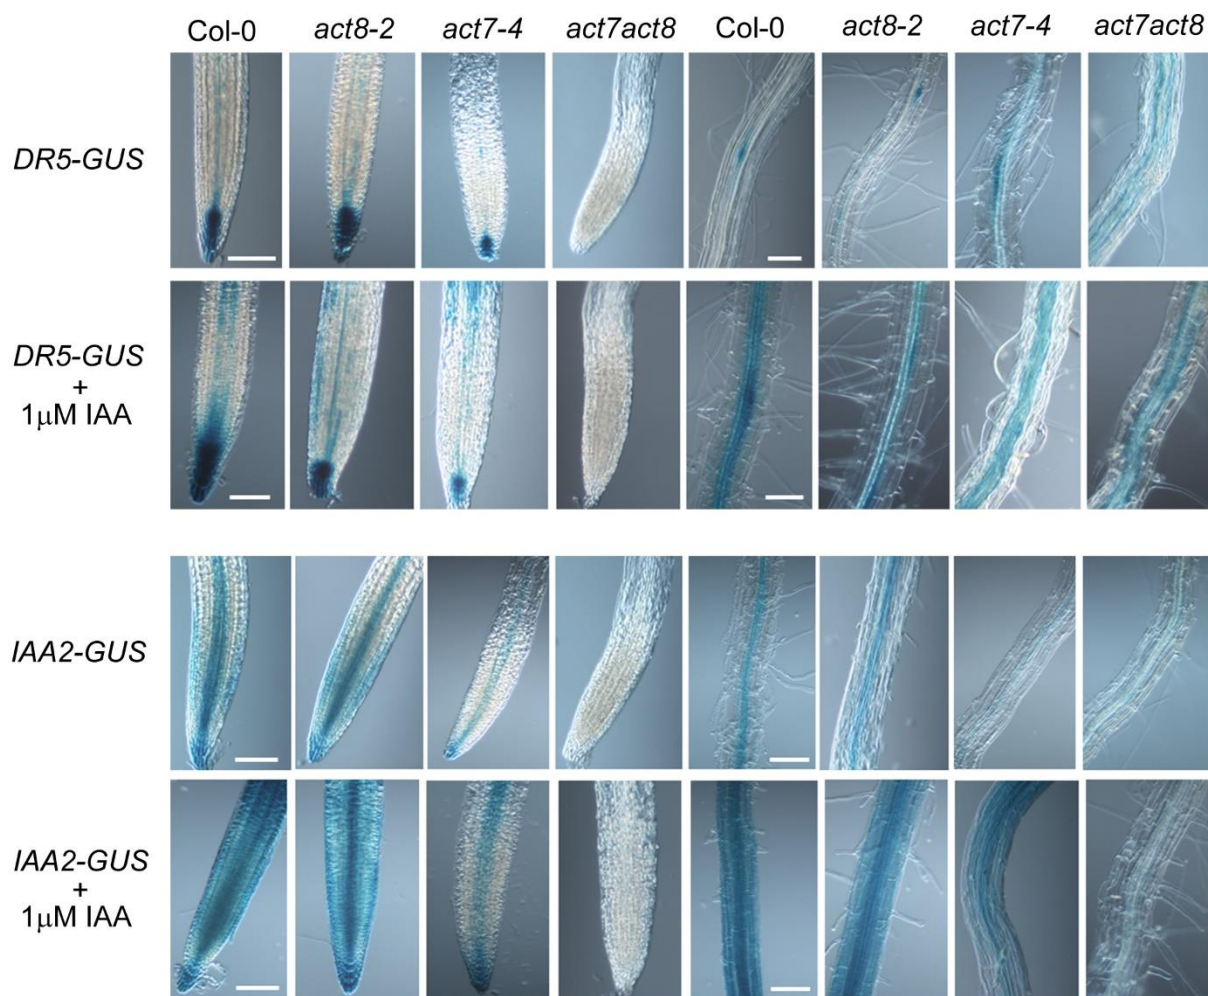

886

887

888 **Figure 6.** Effect of loss of actin isovariant on the root auxin gradient formation

889 Five-day old *DR5-GUS* and *IAA2-GUS* transgenic seedlings in wild-type and actin single and  
890 double mutant background were subjected to GUS staining. *DR5-GUS* transgenic seedlings were  
891 stained in buffer containing 1 mM X- gluc for 3 h and *IAA2-GUS* were stained for 1 h at 37°C.  
892 After the incubation, the roots were cleared for photography. Loss of ACT7 results in formation  
893 of reduced auxin gradient at root tip. Loss of both ACT7 and ACT8 further enhances the  
894 reduction. For exogenous auxin treatment the seedlings were incubated in 1 μM IAA for 3h and  
895 subjected to GUS staining and cell clearing. The images are representative of 20 seedlings from  
896 three-four independent experiments. The results were confirmed with two separate lines for each  
897 crossing. Bars represent 100 μm.

898

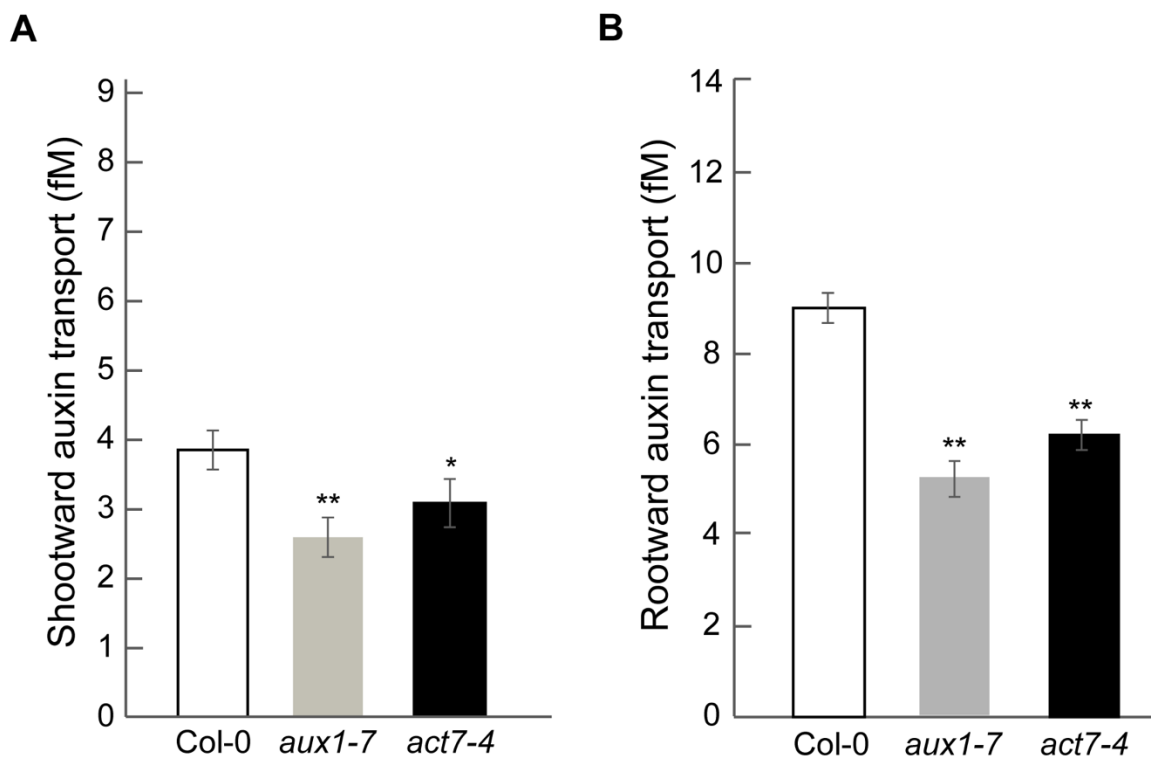

899

900 **Figure 7.** Auxin transport is disrupted in *act7* mutant.

901 Shootward and rootward auxin transport were measured using five-day-old seedlings. The  
902 experiments were performed in triplicate and repeated at least three times. Auxin influx facilitator  
903 mutant *aux1-7* was used as positive control. Asterisks represent the statistical significance between  
904 wild-type and mutants as judged by the Student's *t*-test (\* $P < 0.5$ , \*\* $P < 0.01$ ).

905

906

907

908

909

910

911

912

913

914

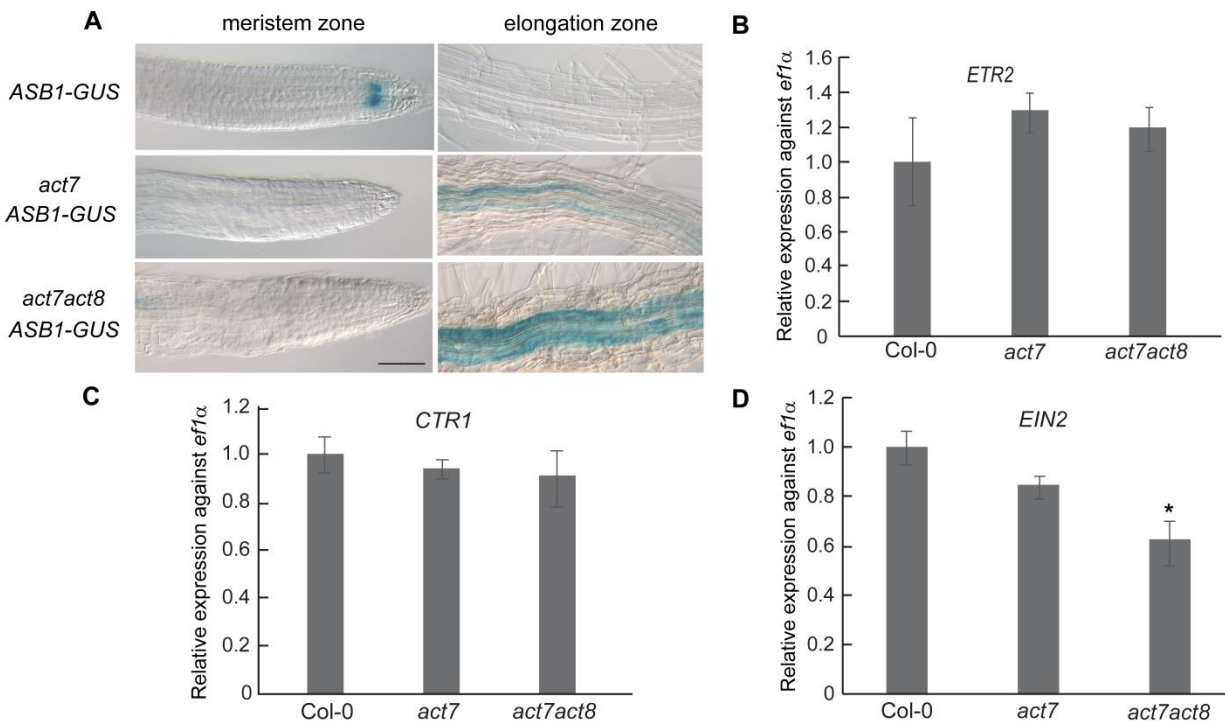

915

916

917 **Figure 8.** Molecular analysis of ethylene response in *act7* and *act7act8* mutants.

918 (C) Ectopic expression of ethylene-induced auxin biosynthesis gene *ANTHRANILATE*  
919 *SYNTHASE β1* in the mutants. The expression is reduced at the root tip but stimulated in the  
920 elongation zone. The images are representative of 20 seedlings from three independent  
921 experiments. Bars represent 50 μm.

922 (B-D) Expression analysis of the ethylene signaling genes in *act7* and *act7act8* mutants. qRT-PCR  
923 was performed using cDNA prepared from the root samples of five-day-old seedlings. All the data  
924 were normalized against *ef1α*. The data were obtained from three independent biological replicates.  
925 Asterisk represents the statistical significance between wild-type and mutants as judged by the  
926 Student's *t*-test (\**P*<0.5).

927

928

929

930

931

932

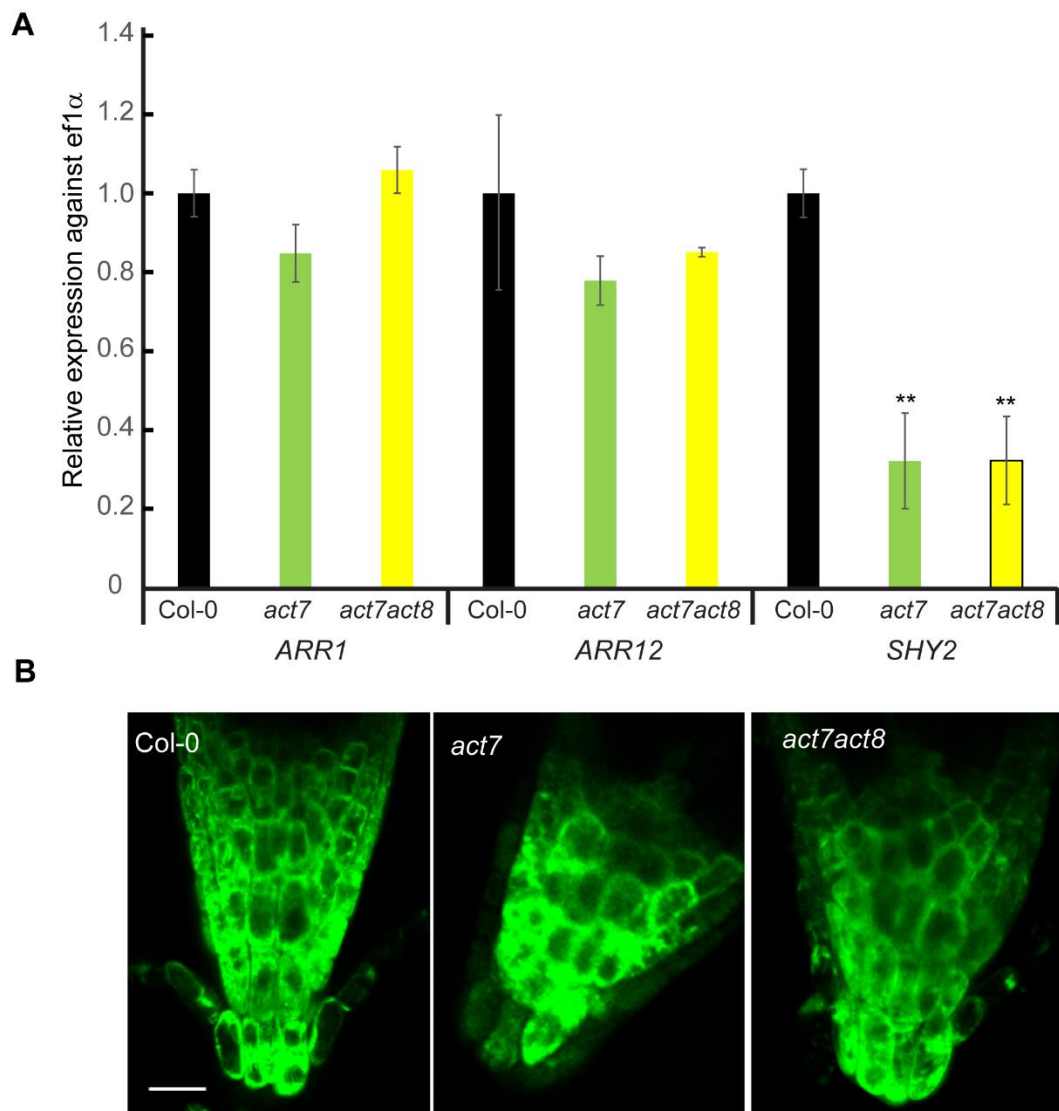

933

934

935 **Figure 9.** Molecular analysis of cytokinin responsive genes in *act7* and *act7act8* mutants.

936 (B) Expression analysis of the *ARR1*, *ARR12* and *SHY2/IAA3* in *act7* and *act7act8* mutants. qRT-  
937 PCR was performed using cDNA prepared from the root samples of five-day-old seedlings. All  
938 the data were normalized against *ef1α*. The data were obtained from three independent biological  
939 replicates. Asterisk represents the statistical significance between wild-type and mutants as judged  
940 by the Student's *t*-test (\*\**P*<0.01).

941 (D) Expression of synthetic cytokinin marker *TCS-GFP* is not altered in *act7* and *act7act8*  
942 mutants. The images are representative of 20 seedlings from three independent experiments. Bar  
943 represents 50 μm.

944

945
