# Supplementary material for: Actin isovariant ACT7 controls root meristem development in Arabidopsis through modulating auxin and ethylene responses
Source: bioRxiv or medRxiv preprint supplement (doi:10.1101/2021.05.12.443766), 2022-01-10
Supplement: Supplementary file [file media-1.pdf]

## Supplemental Information

**Supplemental Table 1:** Primers used for gene expression analysis in this study.

|         |                          |
|---------|--------------------------|
| PIN1-F  | ATCTTCACATGTTTGTGTGG     |
| PIN1-R  | TCGTCTTTGTTACCGAAACT     |
| PIN2-F  | AGATGCCAACGATAATGAGT     |
| PIN2-R  | AGTAATCACCTGAACGATGG     |
| PIN3-F  | AGATCTGACCAAGGTGCTAA     |
| PIN3-R  | CCTAGACCTGTCTTGGATTG     |
| PIN4-F  | ACTTCAACCCAAAATCATTG     |
| PIN4-R  | GTGGGATGCACATTGTACT      |
| PIN7-F  | AGTTGATAATGGAGCCAATG     |
| PIN7-R  | TTATGAGTTTCCTCCACACC     |
| AUX1-F  | CAGATCAGGTAAACGGAAAC     |
| AUX1-R  | TCCAGCTTCCTAGTAAACCA     |
| ARR1-F  | GTCAAGACACAACACGACAG     |
| ARR1-R  | TGTATCCGTAGCCACTCTCT     |
| ARR12-F | CAGCTTCAGACAAACAACAA     |
| ARR12-R | GTTGCGTAGAGAAGCTAGGA     |
| SHY2-F  | GGGTCAAGGAATCTATGTGA     |
| SHY2-R  | CCCACAGAGAATTTGAACAT     |
| ETR2-F  | AGAGAAACTCGGGTGCGATGT    |
| ETR2-R  | TCACTGTCGTCGCCACAATC     |
| CTR1-F  | GCTGCATTACCACAAAAGAGG    |
| CTR1-R  | AGTAAAGCTCGATGTCTGCA     |
| EBF2-F  | TGATGTTGGTCTTGGTGCTGTTGC |
| EBF2-R  | ATTCCAGGACACCGTGAAAGGTCA |
| EIN2-F  | GGAGGGTATGGTGCGTCTTA     |
| EIN2-R  | TGTGGCAAACGTAGGCATC      |

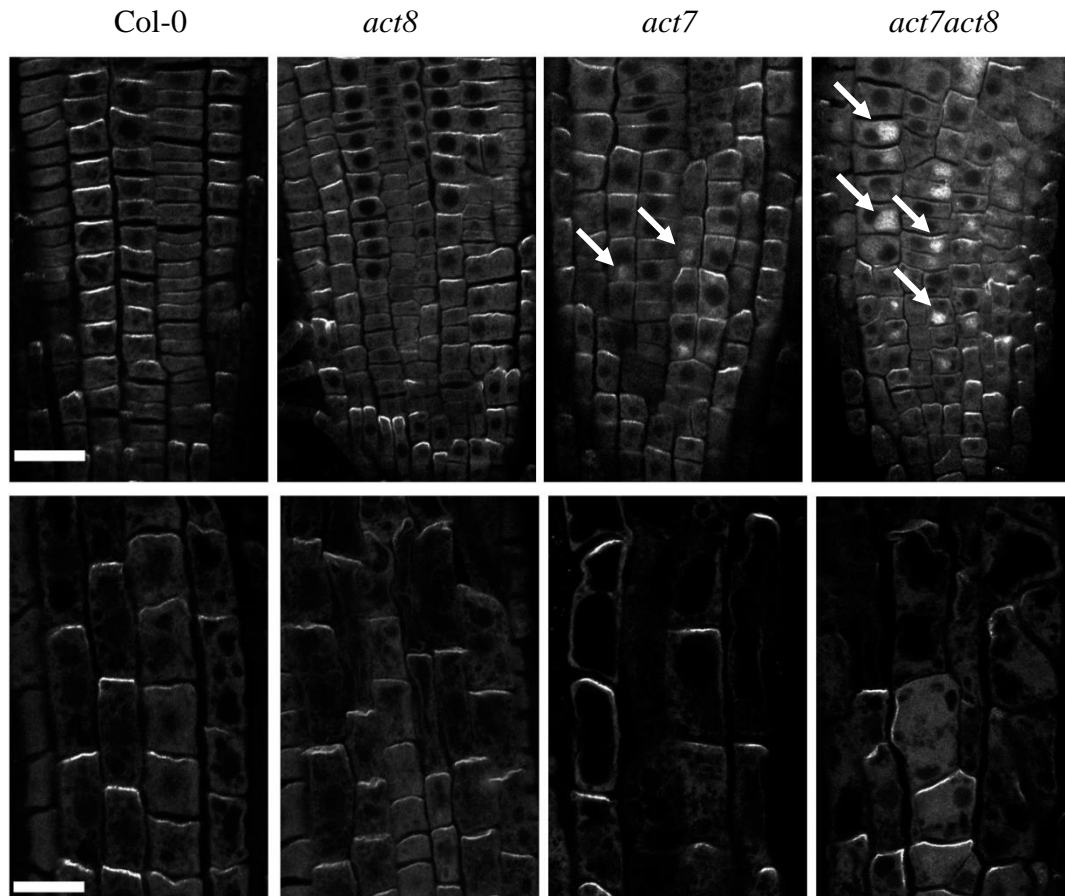

**Supplemental Figure 1:** Localization of PIN2 in actin mutants. Five-day-old seedlings were fixed and processed for immunofluorescence with an anti-PIN1 antibody. The upper panel represents the meristem zone and the lower panel represents transition zone, respectively. Five-day-old seedlings were fixed and processed for immunofluorescence with an anti-PIN1 antibody. The images are single stack and representative of three biological replicates. Imaging was performed with same confocal settings. Arrowheads indicate the intracellular agglomeration of PIN2. Bar=50  $\mu$ m

#### **Method for PIN immunostaining:**

PIN localization was performed using the method described earlier (Rahman et al., 2007). Five-day-old seedlings were used for immunostaining. The primary antibody was anti-PIN2 (1:100 dilution) generated in our lab. The secondary antibody was Cy-3 goat anti-rabbit IgG (1:200, Jackson ImmunoResearch, <http://www.jacksonimmuno.com/>). All imaging was done on a confocal laser microscope, (Nikon laser scanning microscope, Eclipse Ti equipped with Nikon C2 Si laser scanning unit, [www.nikon.co.jp](http://www.nikon.co.jp)) and imaged with 60 $\times$  oil-immersion objective. The images were taken using the same confocal settings for each set of experiments. All the experiments were repeated at least 3 times.

**Reference:**

**Rahman A, Bannigan A, Sulaman W, Pechter P, Blancaflor EB, Baskin TI** (2007) Auxin, actin and growth of the *Arabidopsis thaliana* primary root. *Plant J* **50**: 514–528
